# 1 Growth allometry and dental topography in Upper Triassic 2 conodonts supports trophic differentiation and molar-like 3 element function

4  
5 Valentin Kelz<sup>1</sup>, Pauline Guenser<sup>1</sup>, Michele Mazza<sup>2</sup>, Manuel Rigo<sup>3</sup>, Emilia Jarochovska<sup>1</sup>

6  
7 <sup>1</sup> Fachgruppe Paläoumwelt, GeoZentrum Nordbayern, Friedrich-Alexander-Universität  
8 Erlangen-Nürnberg, Erlangen, Germany

9 <sup>2</sup> Largo Mazza, 29121, Piacenza, Italy

10 <sup>3</sup> Department of Geosciences, University of Padova, Padova, Italy

11  
12 Corresponding Author:

13 Pauline Guenser<sup>1</sup>

14 Fachgruppe Paläoumwelt, GeoZentrum Nordbayern, Friedrich-Alexander-Universität Erlangen-  
15 Nürnberg, Loewenichstr. 28, 91054 Erlangen, Germany

16 Email address: pauline.guenser@gmail.com

## 17 18 Abstract

19 Conodont dental elements are distinguished by their high disparity and rapid morphological  
20 evolution. P<sub>1</sub> elements located in the pharynx are the most rapidly evolving, but their function in  
21 the animal has been only investigated in a handful of taxa and proposed to be analogous to  
22 mammal molars. This hypothesis predicts that their surface area should show positive allometry  
23 with respect to element length, as has been previously identified in 2D projections in two  
24 Carboniferous taxa. Here we apply the same method to test this hypothesis in 3D models of  
25 platform-bearing P<sub>1</sub> elements of two common Late Triassic taxa, *Metapolygnathus communisti*  
26 and *Epigondolella rigoi*. We further hypothesise that these commonly co-occurring taxa differed  
27 in their growth allometry, reflecting their different trophic niches. Platform length grew  
28 isometrically with respect to element length, whereas log-transformed platform area showed  
29 positive allometry with respect to element length, with slopes equal 3.86 in *M. communisti* and  
30 4.16 in *E. rigoi*, supporting a function of the platform analogous to molars and trophic  
31 differentiation. We cross-tested the latter interpretation by dental topographic analysis using  
32 Dirichlet Normal Energy (DNE). Specimens of the adult growth stage of *E. rigoi* showed higher  
33 DNE values than specimens of the same growth stage in *M. communisti*, consistent with stronger  
34 positive allometry of platform surface and with a higher demand for energy in this species.  
35 DNE values of platform surface increased linearly in function of element length and log-  
36 transformed platform area, indicating no ontogenetic changes. Based on DNE values available  
37 for primates, those of the adult growth stages were similar to those reported for insectivores or  
38 folivores in the case of *E. rigoi* and for folivores or omnivores in the case of *M. communisti*.

39 Previous studies applying morphological and ultrastructural proxies for the dietary position of  
40 conodonts addressed mostly stratigraphically older conodont taxa, but our results indicate that  
41 Late Triassic species occupied the predator/scavenger niche in spite of the highly developed  
42 diversity of gnathostomes in this niche. We also show that within this broad niche, co-occurring  
43 taxa differed in their diets, which supports trophic diversification as an important driver of the  
44 remarkable disparity of their elements.

45

## 46 **Introduction**

### 47 **Conodonts and their feeding apparatus**

48 Conodonts are extinct, eel-shaped marine animals that lived from the middle Cambrian to Early  
49 Jurassic (Du et al., 2020). They are early vertebrates (Donoghue, Purnell & Aldridge, 1998)  
50 distinguished by an extensive fossil record (Foote & Sepkoski, 1999; Donoghue, 2001a). The  
51 majority of conodont fossil record consists of the phosphatic elements forming the feeding  
52 apparatus of the animal (Scott, 1934; Schmidt, 1934; Purnell, Donoghue & Aldridge, 2000). Soft  
53 tissues are rarely found and have, so far, not revealed a great diversity of body forms. Because of  
54 this, conodont taxonomy and functional morphology are based on their elements (Mazza, Cau &  
55 Rigo, 2012).

56

### 57 **Evidence of dental function**

58 Several lines of argumentation have been proposed to argue that elements of the conodont  
59 feeding apparatus had a tooth-like function. S and M elements, positioned in the anterior part, i.e.  
60 the mouth, are interpreted to perform a grasping function, whereas P elements, placed in the  
61 posterior part of the apparatus in the pharynx of the animal, have been proposed to have a  
62 function similar to molars of mammals (Purnell & von Bitter, 1992; Purnell, 1994; Donoghue &  
63 Purnell, 1999a). A model of conodonts being suspension feeders has also been suggested (Nicoll,  
64 1987). In this model, elements would be covered in tissue and S and M elements would filter  
65 particles and create current. P<sub>1</sub> elements would only lightly mash food. This model, however, is  
66 not supported by more recent research.

67 Following arguments have been proposed for the dental function of conodont elements: (1) the  
68 presence of microwear patterns on conodont elements, produced *in vivo* (Purnell, 1995;  
69 Martínez-Pérez et al., 2014c); (2) occlusion models (Donoghue & Purnell, 1999a; Jones et al.,  
70 2012a; Martínez-Pérez et al., 2014c,b); (3) Finite Element Analysis (FEA) (Jones et al., 2012b;  
71 Martínez-Pérez et al., 2014c, 2016); (4) ultrastructural adaptation of conodont tissues to dental  
72 function, analogous to enamel (Donoghue, 2001b; Jones et al., 2012a); (5) in some conodont  
73 taxa, extreme sharpness has been proposed to be an adaptation to cutting function in the absence  
74 of jaws acting as levers (Jones et al., 2012b); and the last argument, examined here, (6) growth  
75 allometry (Purnell, 1993, 1994).

76

## 77 **Trophic level of conodonts**

78 Patterns interpreted to be produced by shearing on the surface and repaired during the animal's  
79 growth suggest macrophagy (Purnell, 1995; Donoghue & Purnell, 1999b; Shirley et al., 2018).  
80 An active, predatory lifestyle is supported by the discovery of a conodont specimen with  
81 preserved extrinsic eye musculature (Gabbott, Aldridge & Theron, 1995), which was interpreted  
82 as indicative of conodonts having pattern vision (Purnell, 1994). Calcium isotope analyses  
83 indicated that Triassic conodonts were first-level zooplanktivore and piscivore consumers (Balter  
84 et al., 2019), suggesting that in this Period, conodonts did not lead a purely predatory lifestyle,  
85 but rather were first level consumers. The study suggested that Triassic conodonts may have  
86 been scavengers of small fish.

87

## 88 **Changes in the function of conodont elements during ontogeny**

89 Conodont elements were retained throughout the life of an individual (Donoghue & Purnell,  
90 1999b), recording periodic growth through apposition of crown tissue lamellae (Zhang, Aldridge  
91 & Donoghue, 1997; Dzik, 2008). Shirley et al. (2018) suggested that tooth-like function in  
92 conodont elements may have only developed after a larval stage, during which they exhibited a  
93 different feeding habit, as mechanical wear of conodont elements is only present after a certain  
94 stage of ontogenetic development. After this stage, elements appear to have had prolonged  
95 intervals of dental use and short intervals of growth, during which conodonts did not feed and  
96 their elements were covered in soft tissue, depositing new layers (Bengtson, 1976; Donoghue &  
97 Purnell, 1999b; Shirley et al., 2018).

98

## 99 **Open questions**

100 Conodonts changed their apparatus structure and disparity across their stratigraphic range (Dzik,  
101 1991, 2015), possibly reflecting their evolving niches as marine ecosystems increased in  
102 complexity (Klug et al., 2010; Ginot & Goudemand, 2019). Their morphology also diversified  
103 (Martínez-Pérez et al., 2014a, 2015; Ginot & Goudemand, 2020). This would suggest evolving  
104 trophic niches under the assumption that conodont element morphology is an adaptation to their  
105 diet (Jones et al., 2012a; Guenser et al., 2019; Ginot & Goudemand, 2019; Petryshen et al.,  
106 2020). There is, however, evidence from Ca isotope analysis, suggesting the existence of  
107 competition between some taxa, which indicates that trophic niches overlapped between them  
108 (Balter et al., 2019). Since no direct evidence of what individual taxa ate could be obtained so  
109 far, trophic diversity of conodonts must be inferred from proxies, e.g. by evaluating  
110 morphological and functional diversity of food-processing elements. Here we use growth  
111 allometry, first applied to conodonts by Purnell (1993, 1994), as a proxy for the dental function.

112

## 113 **Allometry**

114 Allometry describes proportional relationships in bodies, usually the size of an organ to the total  
115 size of the organism. Its use has become popular during the paleontological revolution (Gould,  
116 1966; Alberch et al., 1979) and has since become a popular tool in different fields of biology and

117 palaeontology. Allometric relationships can be explored at different scales. Static or size  
118 allometry describes variation among individuals of one population and age group. Ontogenetic or  
119 growth allometry describes variation in one taxon, as individuals of the taxon grow. Evolutionary  
120 allometry describes the variation between taxa, resulting from evolutionary development  
121 (Klingenberg, 1996).

122 Proportional growth, meaning, for example, growth of an organ and growth of the size of the  
123 animal at the same rate is called isometry. Positive allometry then describes the organ growing at  
124 a higher rate than the rest of the animal. An example of this are the long bones of limbs in  
125 humans. Negative allometry, conversely, describes the organ growing at a lower rate than the  
126 rest of the body. An example for this is the development of head height (Gould, 1966; Alberch et  
127 al., 1979; Klingenberg, 1996).

128 For conodonts, this means that if conodont elements had a tooth-like function, and specifically, if  
129 P<sub>1</sub> elements were used like molars, positive ontogenetic allometric growth of the elements  
130 platform to the animal's size can be expected and has been described in *Idiognathodus* sp. and  
131 *Gnathodus bilineatus* (Purnell, 1993, 1994). This is because tooth function is linked to surface  
132 area and because food requirements of an animal increase at a higher rate than an isometrically  
133 growing tooth (Gould, 1966).

134

### 135 **Dirichlet Normal Energy**

136 Under the assumption that P<sub>1</sub> elements had a molar-like function, elements can be further  
137 analysed with methods designed for teeth to infer the diet of the organism. One such method is  
138 The Dirichlet Normal Energy (DNE), a dental topographic analysis that is a measure for the  
139 curvature and morphological irregularity of a surface. Essentially, DNE is a measure of how  
140 much a given surface differs from a plane (Bunn et al., 2011). Surface topography is an  
141 important feature of teeth because they help in breaking down food and can be used to infer diet  
142 (Bunn et al., 2011).

143 In contrast to allometry, DNE is a relatively new tool and has, as of now, mostly been used to  
144 analyse the teeth of mammals, and primates in particular (Bunn et al., 2011; Winchester et al.,  
145 2014).

146

### 147 **Aim of the study**

148 In this work, we address the question, originally proposed by Purnell (1993), that conodont P<sub>1</sub>  
149 elements performed molar-like function and that this is reflected in the growth allometry of their  
150 surface *versus* length. The null hypothesis is that this relationship is isometric, what would be  
151 expected in filter feeders. In contrast to Purnell's (1993) study, which used projections of the  
152 surface on a plane, we use 3D meshes to calculate a more accurate platform area than is possible  
153 with a two dimensional approximation.

154 We further test the hypothesis that conodonts occupying the same environments had the same  
155 trophic position. To reject this hypothesis, slopes of the growth allometry of P<sub>1</sub> element surface  
156 *versus* length should differ.

157 Under the assumption that that P<sub>1</sub> platforms performed a molar-like function, we further  
158 hypothesise that (1) the diets of studied species did not change during ontogenetic growth of one  
159 species and that (2) their diets did not differ between species that lived in similar environments.  
160 This is tested using Dirichlet Normal Energy (DNE) of the platforms of the elements, as  
161 platforms are parts of elements that vary most prominently between elements and thus are  
162 inferred to reflect differences in their trophic positions (Jones et al., 2012b; Martínez-Pérez et al.,  
163 2016).

164 Under the null hypothesis (1), DNE values are expected to increase linearly with conodont size.  
165 Deviations from a linear relationship would suggest that diets changed across growth stages,  
166 allowing us to reject the hypothesis.

167 Under the null hypothesis (2), DNE values of the two species are expected to be the same.  
168 Indistinguishable (overlapping) distributions of DNE values of one growth stage between the two  
169 species would falsify the hypothesis, indicating no difference in diet.

170 We apply these tests to two Upper Triassic conodont species, *Metapolygnathus communisti*  
171 Hayashi, 1968 (Hayashi, 1968) and *Epigondolella rigoi* (Noyan & Kozur, 2007) which often co-  
172 occur in the same assemblages.

173

## 174 **Materials & Methods**

### 175 **Geological location**

176 We used 3D surfaces of P<sub>1</sub> elements of the ozarkodinid conodont species *Metapolygnathus*  
177 *communisti* and *Epigondolella rigoi* from Pizzo Mondello in western Sicily, Italy, where they  
178 were collected from a section of 430 m thick marine limestone that is dated to the upper Carnian  
179 to upper Norian (Mazza, Rigo & Gullo, 2012). These specimens have an average CAI (colour  
180 alteration index) of 1-1.5 which suggests minimal post depositional heating (Epstein, Epstein &  
181 Harris, 1977; Nicora et al., 2007; Mazza, Rigo & Gullo, 2012).

### 182 **Repository**

183 The studied elements are housed in the collection of the Dipartimento di Scienze della Terra “A.  
184 Desio” of the Università degli Studi di Milano. Conodont collection of Pizzo Mondello section is  
185 housed in Milan and in Padova (Department of Geosciences, University of Padova).

186

### 187 **Micro CT-scanning**

188 The 3D surfaces were produced through micro CT-scanning. The elements were scanned with a  
189 resolution of 1 µm with a microtomograph nanotomS (General Electric) of the AniRA-ImmOs  
190 platform, SFR Biosciences (UMS 3444), Ecole Normale Supérieure de Lyon, France. Amira©  
191 software was used for the 3D reconstruction (Guenser et al., 2019).

192

### 193 **Identification of growth stages**

194 The most complete specimens have been selected for 3D scanning (Guenser et al., 2019; Figure  
195 1-Figure 2). P<sub>1</sub> elements were separated into six growth stages (GS) based on the maturity of  
196 morphological characters of the platform (Mazza & Martínez-Pérez, 2015). The six growth

197 stages are GS1 - early juvenile, GS2 – juvenile, GS3 – late juvenile, GS4 – early adult, GS5 –  
198 adult and GS6 – late adult (Mazza & Martínez-Pérez, 2015).

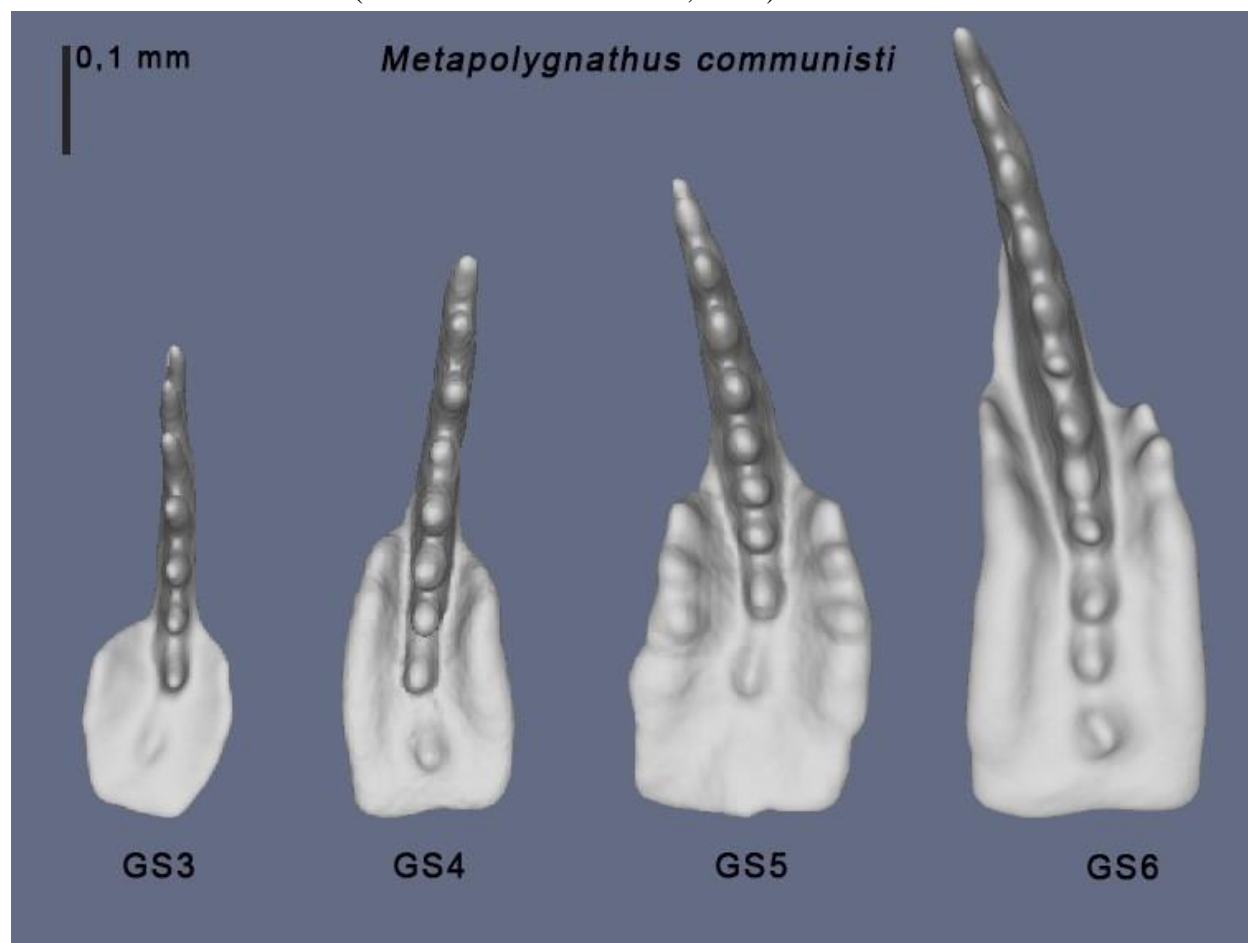

199  
200 Figure 1: Growth stages of *Metapolygnathus communisti*

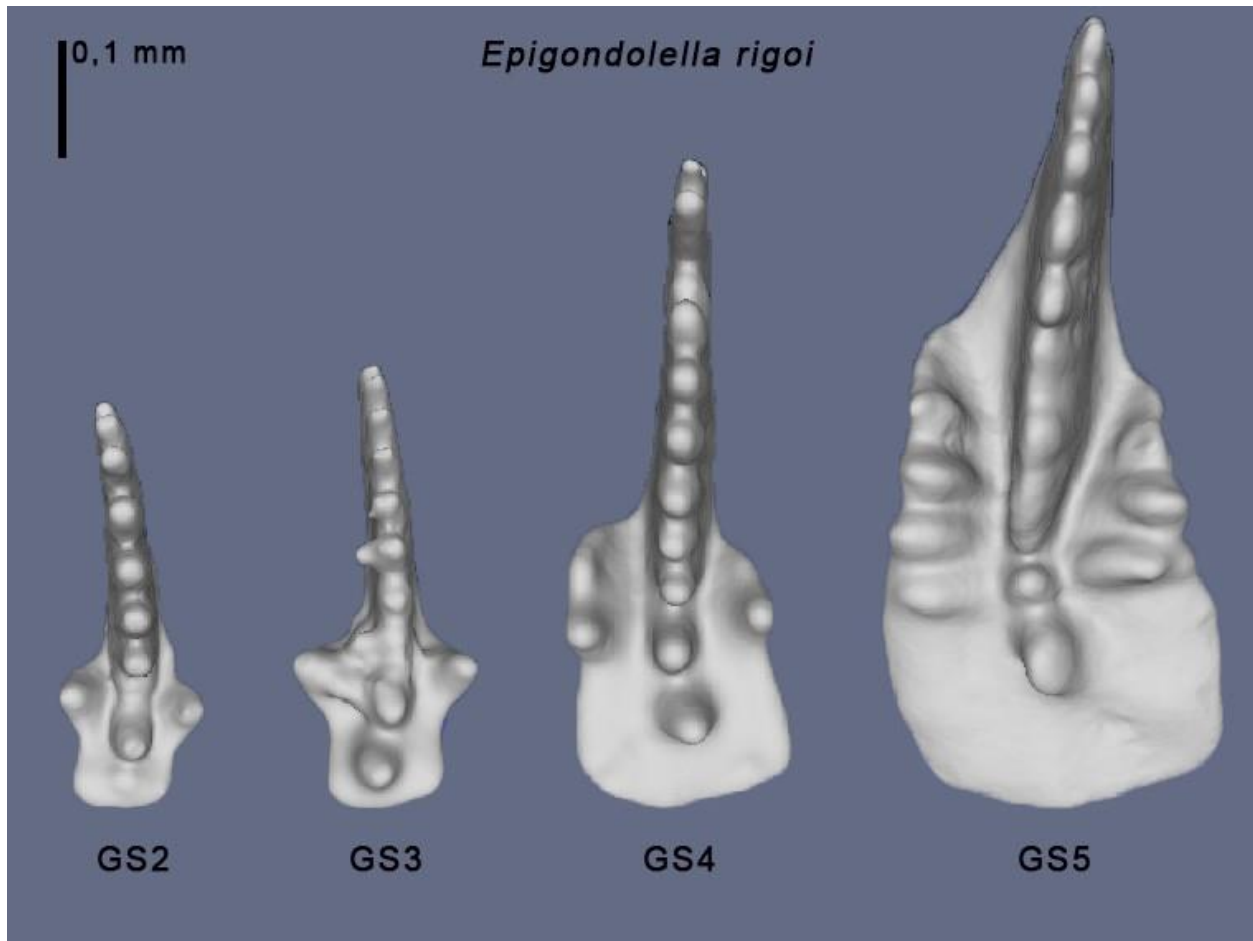

201

202 Figure 2: Growth stages of *Epigondolella rigoi*

203 Growth stage 1 (early juvenile) is characterised by only a simple blade with three to five  
204 denticles and a cusp and a rounded or elongated basal cavity being present. By growth stage 2  
205 (juvenile), elements have developed four to seven blade denticles, a very reduced lateral platform  
206 margin and a deep pit. Their size does not vary much from GS1. Growth stage 3 (late juvenile)  
207 shows six to nine blade denticles that begin to merge in the middle, the formation of a reduced  
208 platform with nodes or denticles on the platform margins not present or at least not fully  
209 developed. The pit gets shallower while the posterior kneel starts to develop. Growth stage 4  
210 (early adult) is characterised by nine to ten almost fused blade denticles, a developed platform  
211 with ornamentation (nodes or denticles on the platform margin) still not fully developed, a  
212 narrow and shallow pit and the starting bifurcation of the kneel, if a bifurcated kneel is present in  
213 that species. By growth stage 5 (adult), all important characters of a species are present.  
214 Elements show ten to thirteen blade denticles that are now completely fused and platform  
215 ornamentation is fully developed. Growth stage 6 (late adult) shows an increase in growth  
216 compared to GS5 (10-20%), and an overdevelopment of characteristics, such as thickening of  
217 platform margins, further fusing of blade and platform denticles and the closing of the pit (Mazza  
218 & Martínez-Pérez, 2015).

219 Twenty-seven P<sub>1</sub> elements of *Metapolygnathus communisti* were used. At Pizzo Mondello, this  
220 species occurs from the upper Carnian to the lower Norian (Mazza, Nicora & Rigo, 2018). The  
221 specimens range from late juvenile to late adult (GS3-GS6), though mature elements are more  
222 abundant (Table 1).

223 Twenty-three P<sub>1</sub> elements of *Epigondolella rigoi* were used. The stratigraphic range of this  
224 species at Pizzo Mondello is from the lower Norian to the middle Norian (Mazza et al., 2010), a  
225 significantly longer interval than *Metapolygnathus communisti*. Elements range from GS2 to  
226 GS5, again, earlier ontogenetic stages are sparse (Table 1).

227

228 Table 1: Numbers of conodont P<sub>1</sub> element specimens by growth stages used for the study.

|     | <i>Metapolygnathus communisti</i> | <i>Epigondolella rigoi</i> |
|-----|-----------------------------------|----------------------------|
| GS2 | 0                                 | 1                          |
| GS3 | 3                                 | 1                          |
| GS4 | 2                                 | 6                          |
| GS5 | 7                                 | 15                         |
| GS6 | 15                                | 0                          |

229

## 230 **Methods**

### 231 **Growth allometry**

232 The length of the element was used as a proxy for the size of the conodont animal, as has been  
233 done in previous studies (Purnell, 1993, 1994; Zhang et al., 2018; Ginot & Goudemand, 2019).

234 The length of the element, as well as the length and the area of the platform, were measured  
235 using the 3D software MeshLab (Cignoni et al., 2008). The length of the element was measured  
236 from the anteriormost point of the blade in a straight line to the middle of the edge of the  
237 element's platform.

238 As the platform is not equally long on the two sides of the blade, its length was measured in  
239 different ways. First, as most elements are curved, the convex side of the platform was measured.

240 In *Metapolygnathus communisti* this tended to be, though not always, the longer side of the  
241 platform. In *Epigondolella rigoi* this was almost exclusively also the longer side. As a second  
242 way of measuring, the longer side of the platform was measured, regardless of curvature (Figure  
243 3).



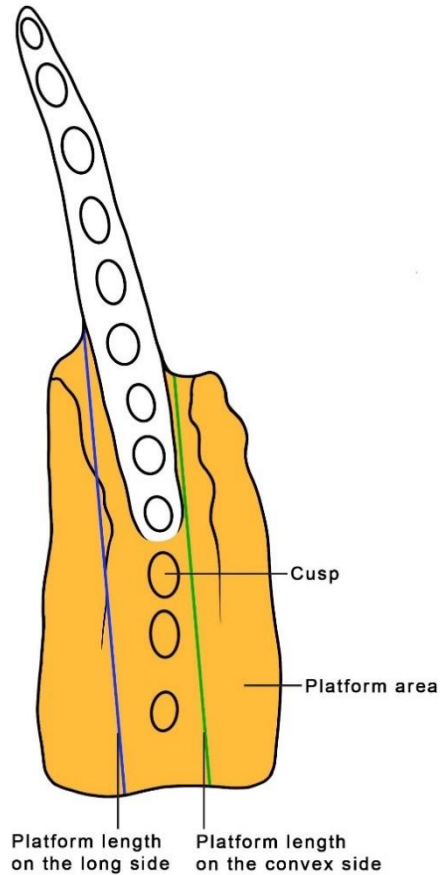

244

245 Figure 3: Measurements of P<sub>1</sub> elements. In most cases one the convex side is also the long side.

246 In *M. communisti*, in both instances, the platform was measured from the most anterior part of  
247 the platform to its posterior end in a line parallel to the imagined symmetrical axis of the  
248 platform (Figure 3).

249 In *E. rigoi*, the platform was measured from the geniculation point to the platform's posterior  
250 end, as the anterior through margin in this species, though reduced (Mazza, Cau & Rigo, 2012)  
251 reaches quite far up the blade, especially in more mature growth stages (Figure 4).

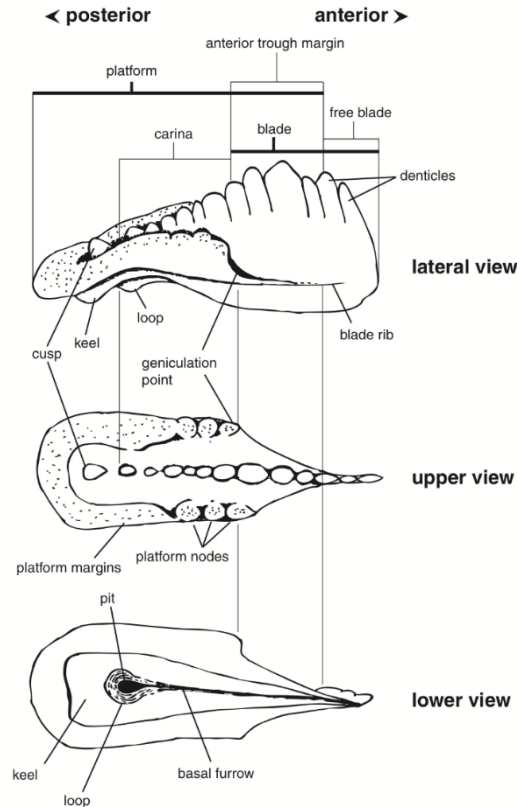

252  
253 Figure 4: Morphological and structural terms used in the description of P<sub>1</sub> elements from Mazza, Cau &  
254 Rigo (2012)

255 The measured area of the platform includes the platform itself and additionally the cusp and any  
256 carinal nodes that follow the cusp on its posterior side (Figure 3).

257 In *M. communisti*, specimens of earlier growth stages tend to exhibit only one posterior carinal  
258 node, which is already present in GS1. From GS3 on, a second posterior node may appear  
259 (Mazza & Martínez-Pérez, 2015). Adult specimens show 3-4 posterior carinal nodes (Mazza,  
260 Rigo & Gullo, 2012). In our measurements, however, we found that we consistently identified  
261 only 2-3 posterior carinal nodes in adult specimens. In *E. rigoi* the cusp is always the second to  
262 last denticle on the carina, followed on its posterior side by a single larger node (Mazza, Rigo &  
263 Gullo, 2012). These parts of P<sub>1</sub> elements were added to the measurements of the platform area,  
264 even though they are taxonomically not part of the platform, because they likely played a similar  
265 part in the processing of food as the platform itself. In *E. rigoi*, the anterior through margin was  
266 not included in the measurements of the platform area. The anterior trough margin is not present  
267 in *M. communisti* (Mazza, Rigo & Gullo, 2012). Mean, median and variance of lengths and areas  
268 of the P<sub>1</sub> elements were calculated for each growth stage with R Software (R Core Team, 2021).  
269 Reduced major axis regression (RMA) was calculated using the R package “smatr” (Warton et  
270 al., 2012) to examine the relationship between the length of the platform and the length of the  
271 element, as well as the logarithm of the platform area and the length of the elements. The

272 platform area was log-transformed to account for its increase as a square of the length of the  
273 element. RMA was chosen as a method because both variables are mutually dependent.

274

## 275 **DNE**

276 Dirichlet Normal Energy (DNE) measures a surface's curvature and complexity. The DNE of an  
277 object is independent of its size and orientation. The DNE equation is commonly written as  
278 follows (Bunn et al., 2011):

$$279 \quad DNE = \sum e(p) \times area(p)$$

280 Here,  $e(p)$  is the Dirichlet Energy Density at a point  $p$ . The sum of the areas of all points  $p$   
281 (however small) on a surface is equal to the total area of the surface. Flat planes have DNE  
282 values of 0. A higher DNE value therefore expresses the elements complexity and the  
283 “sharpness” of a surface (Bunn et al., 2011).

284 The R package “molaR” (Pampush et al., 2016), used here, requires preparation of the meshes  
285 prior to DNE calculation. For this, the platform area was isolated in MeshLab, in the same way  
286 that it was measured.

287 To ensure consistency of DNE calculation, all meshes were simplified to 10 000 faces (Spradley  
288 et al., 2017) using Quadric Edge Collapse Decimation in MeshLab. They were then rescaled so  
289 that each platform area equaled 0.1 mm<sup>2</sup> to ensure comparable resolution of detail in each  
290 element's platform. If not resized, a small P<sub>1</sub> element would have more faces per mm<sup>2</sup> and,  
291 therefore, a higher resolution than a large element with the same number of faces.

292 Meshes were then smoothed in Avizo using the Avizo smoothing function with lambda = 0.6 and  
293 25 iterations.

294 Twenty to thirty smoothing iterations, a conservative amount when compared to other  
295 approaches (Bunn et al., 2011; Winchester et al., 2014; Spradley et al., 2017), are recommended  
296 because they eliminate scanning noise while capturing fine-scale features and avoiding the  
297 creation of artificial dimples that can be caused by oversmoothing (Spradley et al., 2017).

298 Different numbers of iterations (5, 10, 15, 20, 25, 30, 40, 50, 60, 70, 80, 90, and 100) were tested  
299 on a singular specimen of *M. communisti* to determine the impact of the number of smoothing  
300 iterations (Figure 5).

## Impact of smoothing iterations

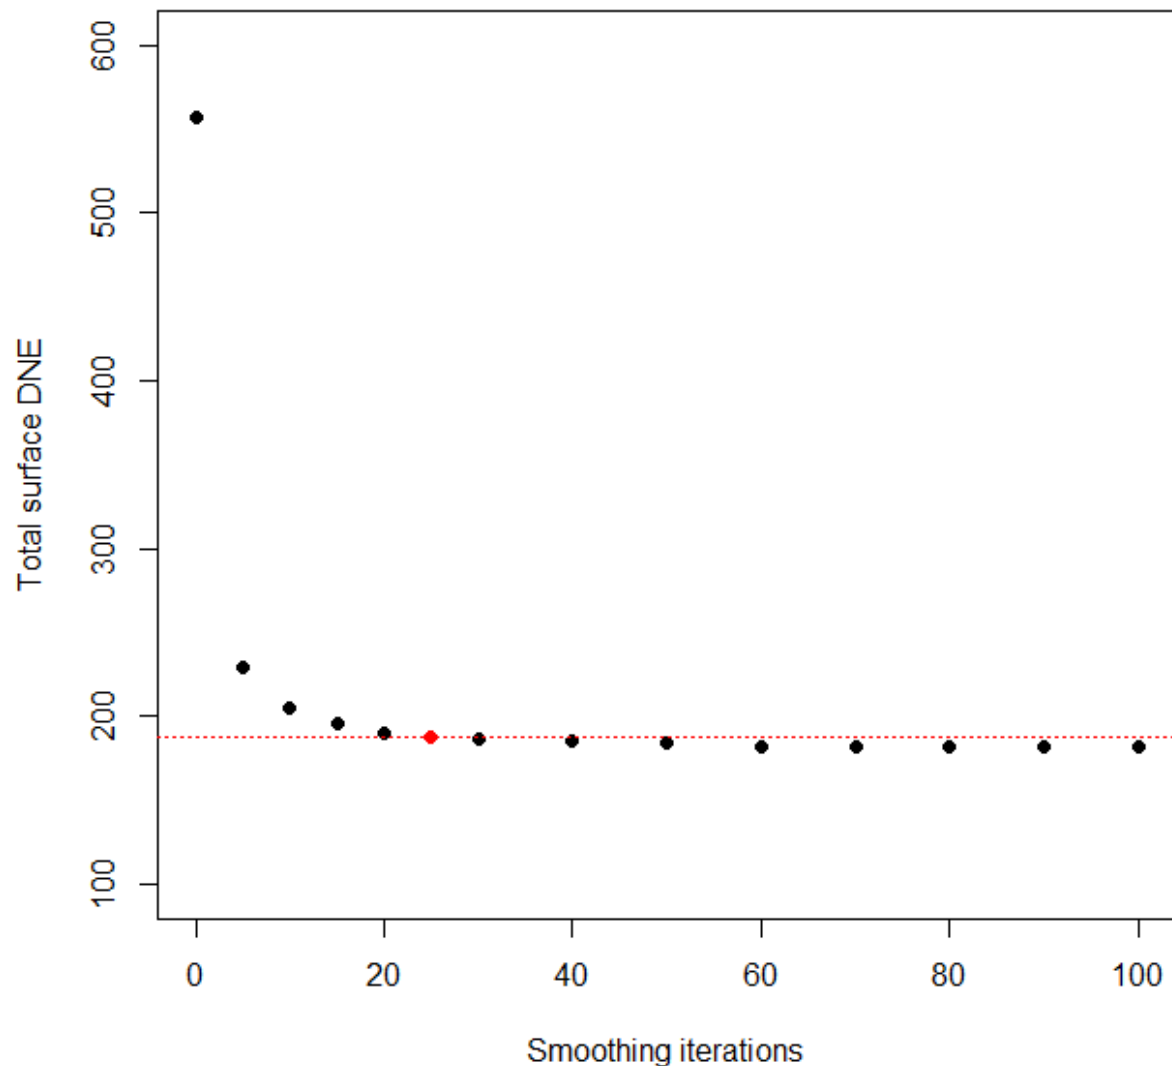

301

302 Figure 5: The impact of different numbers of smoothing iterations on DNE values measured for the  
303 platform of the P<sub>1</sub> element NA37\_A\_02\_GS5 (*M. communisti*). The red dot indicates 25 smoothing  
304 iterations.

305 The meshes were then resaved in MeshLab to avoid errors when calculating the DNE in R  
306 Software. They were imported into R Software as binary *ply* files, where they were cleaned and  
307 where the total surface DNE was calculated using the R package “molaR” (Pampush et al., 2016)  
308 with an included boundary exclusion criterion (BoundaryDiscard=”vertex”), as advised by  
309 Spradley et al. (2017). The total surface DNE is the mean of all DNE values for individual faces  
310 of a surface (Pampush et al., 2016). Mean, median and variance of the DNE were calculated for  
311 each growth stage and species with R Software (R Core Team, 2021).

312 Reduced major axis regression (RMA) was again used to examine the relationship between DNE  
313 and the length of the platform, as well as the log-transformed platform area in both species.  
314 Growth stage 5 was chosen for further analysis, because sufficient numbers of specimens of this  
315 growth stage were available (Table 1). Growth stage 5, representing adults, also allows for  
316 interpretations of the diet.

317

## 318 **Results**

### 319 **Growth allometry**

#### 320 *Metapolygnathus communisti*

321 Regression analysis of P<sub>1</sub> elements of *M. communisti* shows that both sets of variables (the length  
322 of the platform and the length of the element, as well as the log-transformed platform area and  
323 the length of the elements) are correlated (Figure 6A-C). The regression slopes of the length of  
324 the element over that of the platform, as well as the regression slope of the length of the element  
325 over the log-transformed area of the platform, differed significantly from one, i.e. from isometric  
326 growth ( $p < 0.000001$ ; Figure 6B, C). Although the long side of the element platform is also the  
327 concave one in most cases, there are differences between the two ways the platform area was  
328 measured. This is reflected in the slope coefficients deviating slightly from each other (Figure  
329 6A).

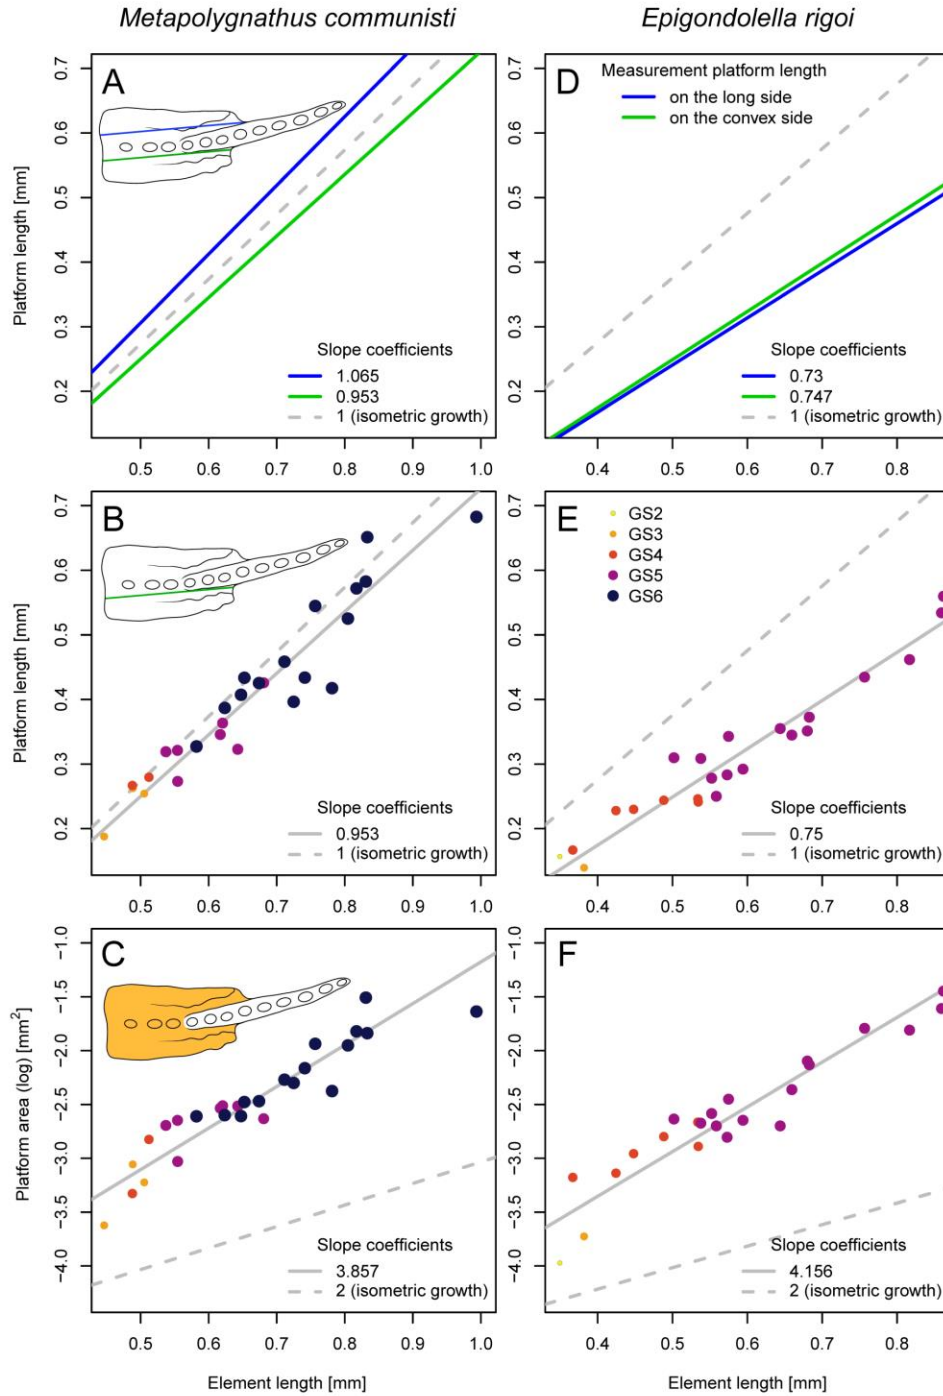

331 Figure 6. Allometric growth of *M. communisti* (n=27) and *E. rigoi* (n=23); each dot represent an element  
332 and the colours are related to the growth stage. A. Platform length over element length for *M. communisti*;  
333 comparison of long and convex platform length. B. Platform length over element length for *M.*  
334 *communisti*; convex platform length only. C. Platform area over element length for *M. communisti*. D.  
335 Platform length over element length for *E. rigoi*; comparison of long and convex platform length. E.  
336 Platform length over element length for *E. rigoi*; convex platform length only. F. Platform area over  
337 element length for *E. rigoi*.

338  
339 Slope coefficients for the platform length over element length were 0.95 and 1.06 (length of  
340 platform measured on the convex and on the long side, respectively). Both values are similar to  
341 the isometric value of one, which indicates proportional growth.

342 The slope coefficient for the log-transformed platform area was 3.86, which is greater than the  
343 isometric value of two, indicating positive allometry. The platform area grew at a faster rate than  
344 the element length (Figure 6C).

345

#### 346 ***Epigondolella rigoi***

347 In this species, both sets of variables (the length of the platform and the length of the element, as  
348 well as the log transformed platform area and the length of the elements) are also correlated  
349 (Figure 6D-F). The regression slopes of the length of the element over that of the platform, as  
350 well as the regression slope of the length of the element over the log-transformed area of the  
351 platform, differed significantly from zero ( $p < 0.000001$ ). Differences between the two ways the  
352 platform length was measured were barely visible in this species, because the long and the  
353 convex side of the platform describe the same side in almost all cases (Figure 6D).

354 Slope coefficients for the platform length were 0.75 and 0.73 (length of platform measured on  
355 the convex and on the long side, respectively). These values are smaller than the isometric value  
356 of one, which indicates negative allometry. Here, the platform length grew at a lower rate than  
357 the element length. Slope coefficients for the platform area was 4.16, which is greater than the  
358 isometric value of two, indicating positive allometry (Figure 6F).

359

#### 360 **Comparison of growth allometry in different species**

361 The hypothesis of molar-like function of P<sub>1</sub> elements could not be rejected based on positive  
362 growth allometry of the platform area in both species. In *M. communisti*, *Idiognathodus* sp. and  
363 *Gnathodus bilineatus*, slope coefficients of the platform length close or slightly greater to the  
364 isometric value one (*Idiognathodus* sp.: 1.089; Purnell, 1993, 1994; *Gnathodus bilineatus*: 1.167;  
365 Purnell, 1994) indicate near isometric growth or slight positive allometric growth in the species.  
366 Platform length and element length grew at similar rates (Figure 7A).

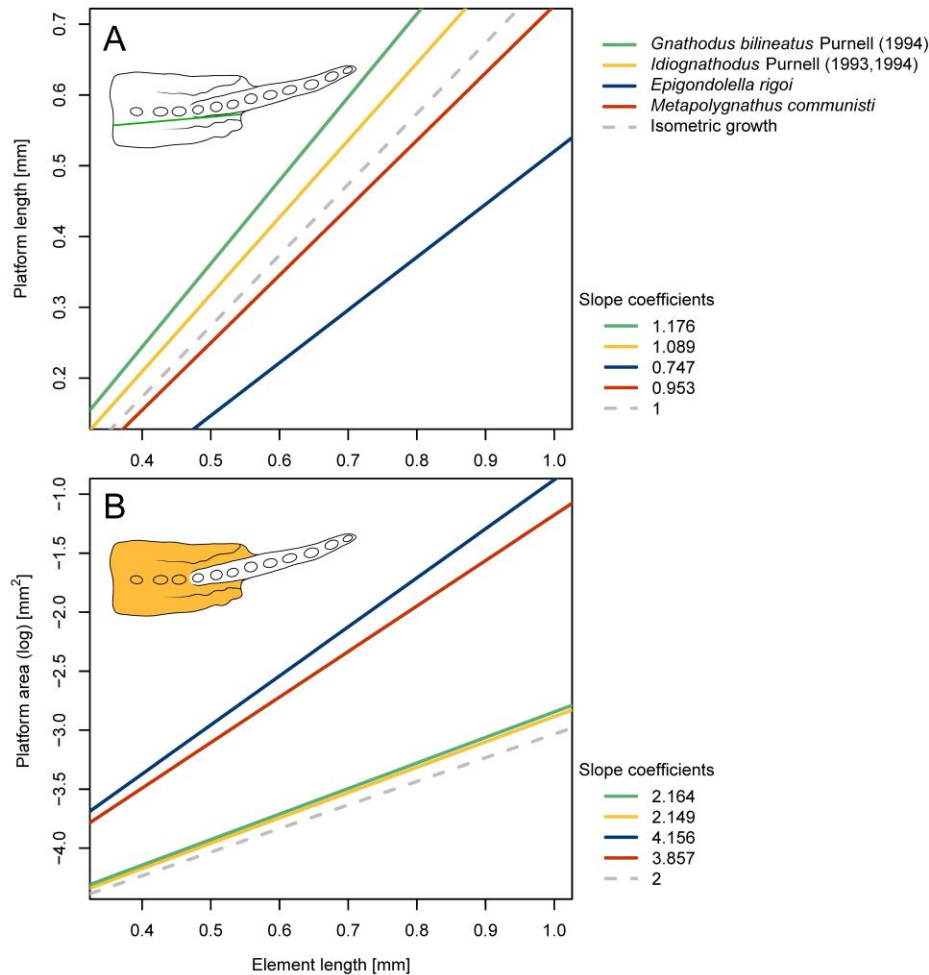

367  
368 Figure 7. Comparison of the allometric growth *Gnathodus bilineatus* (Purnell, 1994), *Idiognathodus* sp.  
369 (Purnell, 1993, 1994), *Epigondolella rigoi* and *Metapolygnathus communisti*. A. Platform length over  
370 element length. Platform length in *M. communisti* and *E. rigoi* was measured on the convex side. B.  
371 Platform area over element length.

372 In *E. rigoi*, the negative allometry of the platform length did not follow the same growth pattern  
373 as the other species. Its platform elongated at a slightly slower rate than the length of the element  
374 (Figure 7A).

375 Platform areas in all four species showed positive allometry over element length, but at different  
376 rates. *Idiognathodus* sp. and *Gnathodus bilineatus* had the lowest slope coefficients of 2.149 and  
377 2.164, respectively (Purnell, 1993). The slope coefficients in *M. communisti* and *E. rigoi* were



378 considerably higher (Figure 7B). This may be explained by the fact that the platform area of  
379 *Idiognathodus* sp. was calculated as a two-dimensional surface, based on the platform's outline,  
380 and the platform area of *Gnathodus bilineatus* was approximated with the calculation of an  
381 ellipse with the platform's dimensions (Purnell, 1994). In contrast, platform areas of *M.*  
382 *communisti* and *E. rigoi* were in this study calculated based on three dimensional meshes.

383

#### 384 DNE

#### 385 DNE through ontogeny

386 Distributions of DNE values over element platforms are shown in Figure 8 and Figure 9. In both  
387 species, ontogenetically younger growth stages were represented by fewer specimens (Table 1),  
388 which made observations of these stages less conclusive. Nevertheless, in both *M. communisti*  
389 and *E. rigoi*, DNE values increased consistently with the element length (Figure 10A), as well as  
390 with the platform area (Figure 10B). No shifts in the growth trajectory of DNE were observed.

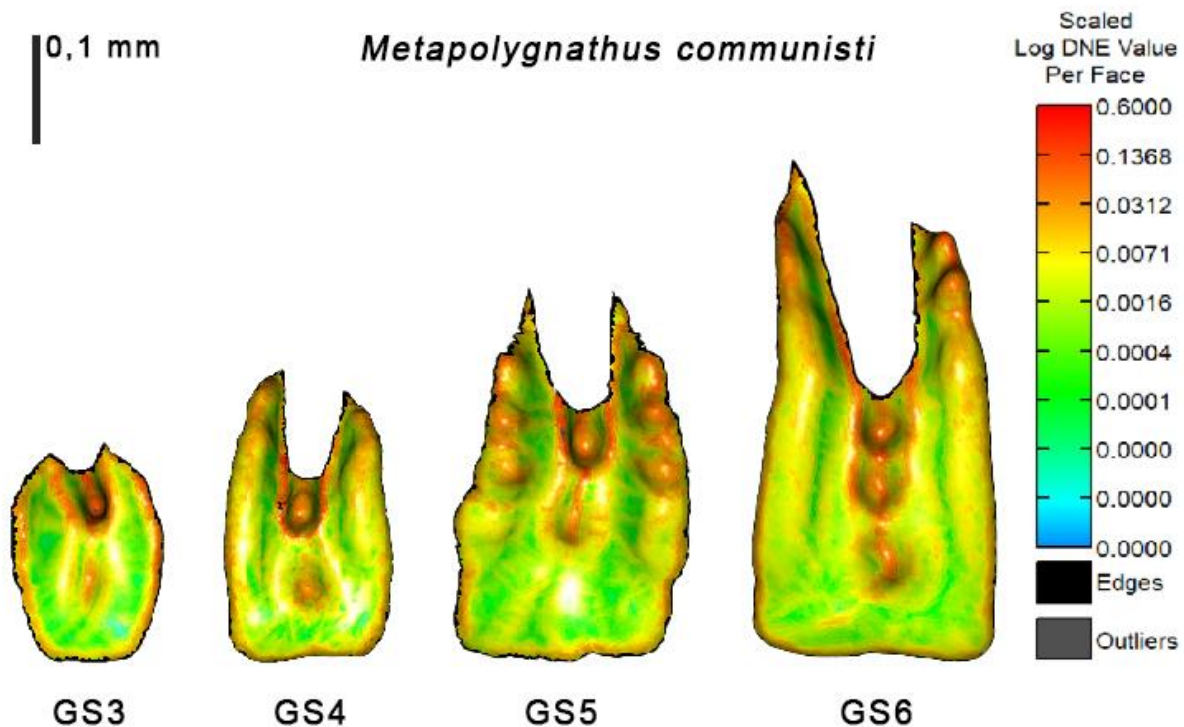

391

392 Figure 8: Log-transformed DNE values across growth stages GS3 to GS6 of *Metapolygnathus*  
393 *communisti*.

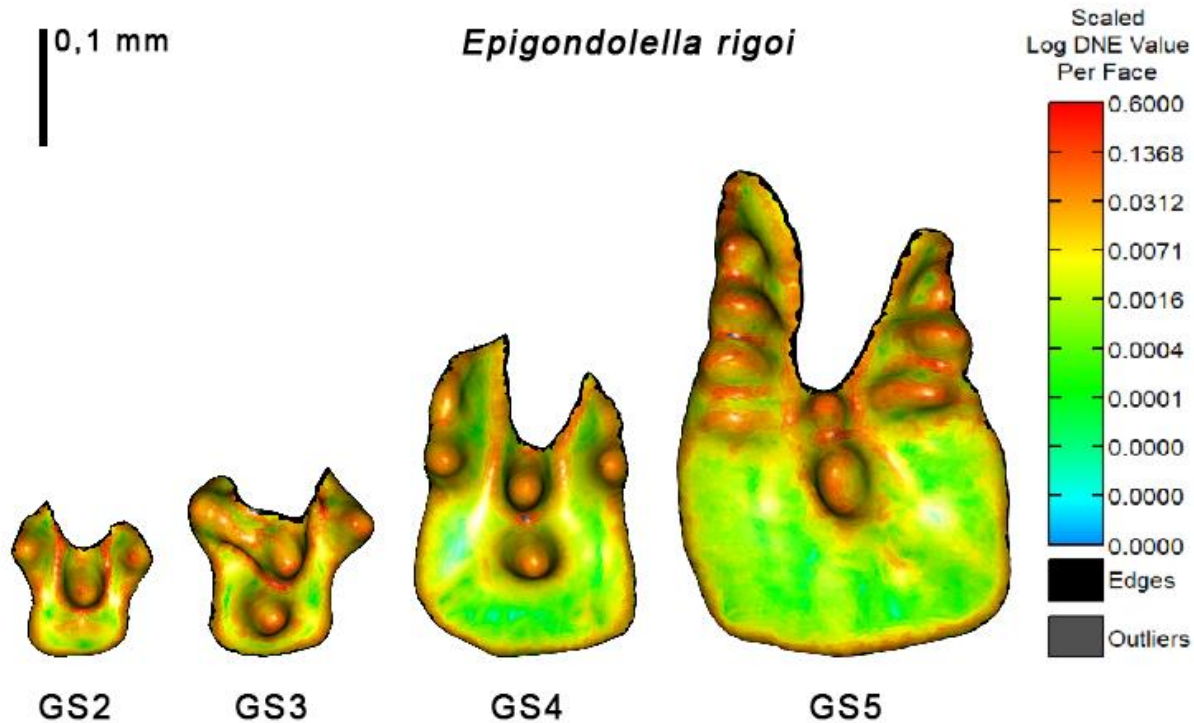

394

395 Figure 9: Log-transformed DNE values across growth stages GS2 to GS5 of *Epigondolella rigoi*.

396 The hypothesis that the dietary niches of both species, assessed using DNE as a proxy, remained  
397 the same throughout ontogeny could not, therefore, be rejected.

398 *Metapolygnathus communisti*

399 Regression analysis of P<sub>1</sub> elements of *M. communisti* showed that element length, as well as  
400 platform area, are correlated with DNE ( $R^2 = 0.52$  and  $0.61$ , respectively). Regression slopes of  
401 the DNE values over element length and the log-transformed platform area differed significantly  
402 from one ( $p < 0.0001$ ). The slope coefficients are  $290.6725$  and  $75.41139$  for element length and  
403 platform area, respectively (Figure 10A-B).

404 *Epigondolella rigoi*

405 Regression analysis of P<sub>1</sub> elements of *E. rigoi* showed that element length, as well as platform  
406 area, are correlated with DNE ( $R^2 = 0.32$  and  $0.43$  respectively). Regression slopes of DNE over  
407 element length and the log-transformed platform differed significantly from one ( $p < 0.001$ ).  
408 Slope coefficients were  $395.6475$  and  $92.75222$  for element length and platform area,  
409 respectively (Figure 10A-B).

410

#### 411 **Comparison of DNE values in adult elements**

412 For the comparison of DNE values between P<sub>1</sub> element platforms of *M. communisti* and *E. rigoi*,  
413 growth stage 5 is of particular interest, because both species have enough specimens of this stage  
414 to allow further analysis (Table 1). Additionally, growth stage 5 contains specimens of adult

415 conodonts which makes their DNE values suitable for comparisons outside of conodonts. It  
416 needs to be remarked that the classification of growth stage 5 as “adult” does not consider  
417 biology, but the morphological maturity of the elements (Mazza & Martínez-Pérez, 2015).  
418 As with the other growth stages, specimens of growth stage 5 of *E. rigoi* showed higher DNE  
419 values than specimens of growth stage 5 of *M. communisti*, though there was some overlap  
420 (Figure 10C). The difference in DNE values between the two species appears big enough to  
421 reject the hypothesis that both species shared the same diet.

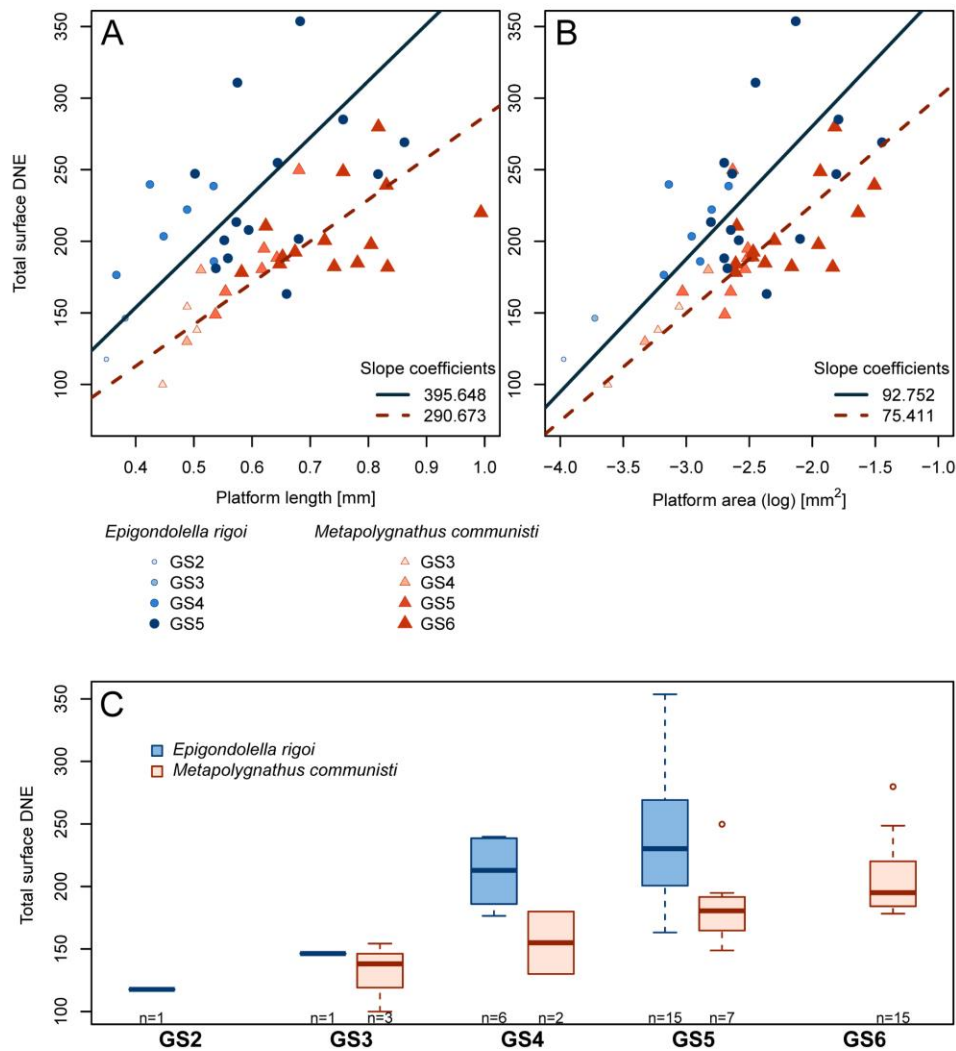

423 Figure 10: Regression of total surface DNE values over platform length (A), log-transformed platform  
424 area (B) in P<sub>1</sub> elements of *Epigondolella rigoi* and *Metapolygnathus communisti* and distribution of DNE  
425 values across growth stages in both species (C).  
426

## 427 **Discussion**

### 428 **Growth Allometry**

429 We were able to reject the hypothesis that platform surface area increased isometrically with  
430 respect to element length in P<sub>1</sub> elements of *Metapolygnathus communisti* and *Epigondolella rigoi*  
431 in favour of the alternative hypothesis that the growth allometry was positive, as expected in dental  
432 organs functioning as molars. This finding supports previous finding of positive growth allometry  
433 in these organs in much older, Carboniferous, ozarkodinid taxa *Gnathodus bilineatus* and  
434 *Idiogonathodus* sp. (Purnell, 1993, 1994). It is consistent with previous research on microwear  
435 (Purnell, 1995; Martínez-Pérez et al., 2014b), enamel-like ultrastructure of conodont lamellar  
436 crown tissue (Purnell, Donoghue & Aldridge, 2000), and finite element analysis (Jones et al.,  
437 2012a).

438 The calculation of the platform area in three dimensions, as opposed to two dimensional  
439 approximation based on platform outline or platform dimensions (Purnell, 1994), yields more  
440 exact measurement of the area. Furthermore, measurements based on pictures suffer from  
441 distortions resulting from projecting on a plane, where differences in levelling the photographed  
442 specimens might affect the results. The effect of 3D measurements of the platform is a higher slope  
443 coefficient, meaning a more strongly positive allometry of the platform (Figure 7B).

444 The decision what to include in the platform for allometric analysis is worth discussing, because  
445 it is somewhat subjective. In this work, we decided to include the cusp and all carinal nodes  
446 posterior to it, because, in many cases, the cusp marked a notable transition between sharper  
447 denticles of the blade and flatter nodes on the platform. This resulted in different numbers of  
448 posterior nodes in *M. communisti*, because, in this species, the number of posterior nodes differs  
449 between growth stages (Mazza, Rigo & Gullo, 2012; Mazza & Martínez-Pérez, 2015). This  
450 variation has a greater effect in 3D measurements than it would in 2D. In *E. rigoi* the number of  
451 posterior nodes stays the same (Mazza, Rigo & Gullo, 2012).

452

### 453 **Dirichlet Normal Energy**

#### 454 **Ontogenetic development of DNE**

455 In *M. communisti*, as well as in *E. rigoi*, DNE values increased linearly with body size, where  
456 element length was used as a proxy for body size (Zhang et al., 2018; Ginot & Goudemand, 2019).  
457 This does not contradict the possible presence of a larval stage, during which conodonts had a  
458 different method of feeding (Shirley et al., 2018), because all specimens that are considered here  
459 were more mature.

460

### 461 **Comparison of DNE values in adult elements**

462 Differences in DNE values between *M. communisti* and *E. rigoi* are great enough to merit a careful  
463 suggestion of different diets between the two species. More DNE analyses on conodonts are  
464 needed to understand the scope of DNE values in conodonts and to confidently suggest that a

465 certain discrepancy between DNE values of different species reflects different dietary niches.  
466 Here, the only reference values were those available for exclusively terrestrial mammals, and  
467 mostly for primates.

468 DNE values of growth stage 5 specimens of *M. communisti* and *E. rigoi* are similar to those  
469 reported for insectivores or folivores in the case of *E. rigoi* and for folivores or omnivores in the  
470 case of *M. communisti*, had these DNE values been observed in primates (Bunn et al., 2011;  
471 Winchester et al., 2014). Within the range of DNE values observed in primates, these values are  
472 relatively high. Though these dietary classifications are not applicable to conodonts, they may  
473 offer a general reference point for the methods of breaking down different food types. Insectivores  
474 rely on sharp cusps to apply maximal force on a small surface, in order to pierce hard insect chitin,  
475 folivores also use steeply sloped cusps to shear tough cellulose-rich leaves. (Lucas, 1979; Strait,  
476 1997).

477 It is possible that conodont element platforms adapted to break down food types with similar  
478 properties. It has been suggested that conodonts may have punctured arthropod larvae (Dzik,  
479 2021), which would be consistent with the DNE values observed in *M. communisti*.

480

#### 481 **Problems in DNE analysis of conodont elements**

482 There are several challenges researchers face when working with DNE in conodonts. As DNE is  
483 a comparatively new tool, reference values and understanding of variability (e.g. intraspecific,  
484 ontogenetic, resulting from preservation) is limited. So far, DNE research has focused on  
485 gnathostomes, whose tooth function is, in large part, reliant on jaws acting as levers. This  
486 necessitates that the comparisons that are drawn here between conodont elements and primate  
487 molars must be viewed as extremely hypothetical. Marine environment, evolutionary distance and  
488 the lack of jaws in conodonts make it likely that tooth function is not completely analogous  
489 between the two.

490 Typical applications of DNE do not take into account ontogenetic development of conodonts,  
491 because, contrary to mammalian molars, in conodonts the number of denticles in P<sub>1</sub> element  
492 platforms increases during ontogenetic growth. This plays into the recurring problem of what to  
493 include in the conodont platform, which also has an impact on DNE. This was especially  
494 problematic in *M. communisti*, because here, in addition to denticles on the platform margins  
495 increasing in number over ontogenetic growth, the number of carinal nodes posterior to the cusp  
496 varies between growth stages.

497 A consistent protocol of mesh preparation prior to DNE calculation is also needed. Especially the  
498 number of smoothing iterations varies in current literature and this can have impact on DNE results  
499 (Spradley et al., 2017). This is important, because comparisons are most conclusive when drawn  
500 between data with comparable preparation. We second the recommendations by Spradley et al.  
501 (2017): a conservative number of smoothing iterations (20-30) using non-Laplace-based  
502 smoothing operators, such as that implemented in Avizo, and mesh simplification to a fixed  
503 number of faces.

504

#### 505 **Conclusions**

506 We tested the hypothesis that conodont P<sub>1</sub> elements performed molar-like function by analysing  
507 the growth allometry of platform surface area *versus* length, following the protocol by Purnell  
508 (1993, 1994), but in 3D meshes rather than on 2D projections of platforms. We further used  
509 slopes of this allometric relationships to test the hypothesis that conodonts occupying the same  
510 environments shared the same trophic positions. We applied the test to 3D surfaces of P<sub>1</sub>  
511 elements of the ozarkodinid conodont species *Metapolygnathus communisti* and *Epigondolella*  
512 *rigoi* from the Upper Triassic section Pizzo Mondello in western Sicily, Italy. Platform length  
513 grew isometrically with respect to element length, whereas log-transformed platform area  
514 showed positive allometry with respect to element length, with slopes equal 3.86 in *M.*  
515 *communisti* and 4.16 in *E. rigoi*. These values are substantially higher than those reported for  
516 Carboniferous conodonts *Idiognathodus* sp. and *Gnathodus bilineatus* (Purnell, 1993), but this  
517 may reflect a more precise measurement of surface area in 3D models compared to 2D  
518 projections used in previous studies. Thus, it is not possible to compare these values directly, but  
519 we conclude that stronger positive allometry of platform area in *E. rigoi* indicates higher  
520 metabolic needs and might be a proxy for a higher trophic level compared to *M. communisti*.  
521 We also applied dental topographic analysis using Dirichlet Normal Energy (DNE) to the  
522 platforms in order to test the hypotheses that the diets of *M. communisti* and *E. rigoi* did not  
523 change during ontogenetic growth and that they occupied the same dietary niches. Surface DNE  
524 values increased linearly in function of element length and log-transformed platform area,  
525 indicating no ontogenetic changes. Specimens of the adult growth stage of *E. rigoi* showed  
526 higher DNE values than specimens of the same growth stage in *M. communisti*, consistent with  
527 stronger positive allometry of platform surface and with a higher demand for energy in this  
528 species. Based on DNE values available for primates, those of the adult growth stages were  
529 similar to those reported for insectivores or folivores in the case of *E. rigoi* and for folivores or  
530 omnivores in the case of *M. communisti*.  
531 Previous studies applying morphological and ultrastructural proxies for the dietary position of  
532 conodonts addressed mostly stratigraphically older conodont taxa, but our results indicate that  
533 Late Triassic species occupied the predator/scavenger niche in spite of the highly developed  
534 diversity of gnathostomes in this niche. We also show that within this broad niche, co-occurring  
535 taxa differed in their diets, which supports trophic diversification as an important driver of the  
536 remarkable disparity of their elements.

537

## 538 **Acknowledgements**

539 We thank Bryan Shirley for support in using Aviso and Wyatt Petryshen for advice on cleaning  
540 and saving meshes. We also thank Nicolas Goudemand for supporting the project. PG was  
541 supported by Visiting Scholarship awarded by Friedrich-Alexander-Universität Erlangen-  
542 Nürnberg. EJ was supported by Deutsche Forschungsgemeinschaft (project no JA 2718/3-1). MR  
543 was supported by DOR2054230/20 by University of Padova.

544

## 545 **References**

- 546 Alberch P, Gould SJ, Oster GF, Wake DB. 1979. Size and shape in ontogeny and phylogeny.  
547 *Paleobiology* 5:296–317.
- 548 Balter V, Martin JE, Tacail T, Suan G, Renaud S, Girard C. 2019. Calcium stable isotopes place  
549 Devonian conodonts as first level consumers. *Geochemical Perspectives Letters* 10:36–39.
- 550 Bengtson S. 1976. The structure of some Middle Cambrian conodonts, and the early evolution of  
551 conodont structure and function. *Lethaia* 9:185–206. DOI: 10.1111/j.1502-3931.1976.tb00966.x.
- 552 Bunn JM, Boyer DM, Lipman Y, St. Clair EM, Jernvall J, Daubechies I. 2011. Comparing Dirichlet  
553 normal surface energy of tooth crowns, a new technique of molar shape quantification for dietary  
554 inference, with previous methods in isolation and in combination. *American Journal of Physical  
555 Anthropology* 145:247–261. DOI: 10.1002/ajpa.21489.
- 556 Cignoni P, Callieri M, Corsini M, Dellepiane M, Ganovelli F, Ranzuglia G. 2008. Meshlab: an open-  
557 source mesh processing tool. In: *Eurographics Italian Chapter Conference*. 129–136.
- 558 Donoghue PCJ. 2001a. Conodonts meet cladistics: recovering relationships and assessing the  
559 completeness of the conodont fossil record. *Palaeontology* 44:65–93. DOI: 10.1111/1475-  
560 4983.00170.
- 561 Donoghue PCJ. 2001b. Microstructural variation in conodont enamel is a functional adaptation.  
562 *Proceedings of the Royal Society of London. Series B: Biological Sciences* 268:1691–1698. DOI:  
563 10.1098/rspb.2001.1728.
- 564 Donoghue PCJ, Purnell MA. 1999a. Mammal-like occlusion in conodonts. *Paleobiology* 25:58–74.
- 565 Donoghue PCJ, Purnell MA. 1999b. Growth, function, and the conodont fossil record. *Geology* 27:251–  
566 254. DOI: 10.1130/0091-7613(1999)027<0251:GFATCF>2.3.CO;2.
- 567 Donoghue PCJ, Purnell MA, Aldridge RJ. 1998. Conodont anatomy, chordate phylogeny and vertebrate  
568 classification. *Lethaia* 31:211–219. DOI: 10.1111/j.1502-3931.1998.tb00509.x.
- 569 Du Y, Chiari M, Karádi V, Nicora A, Onoue T, Pálffy J, Roghi G, Tomimatsu Y, Rigo M. 2020. The  
570 asynchronous disappearance of conodonts: New constraints from Triassic-Jurassic boundary

- 571 sections in the Tethys and Panthalassa. *Earth-Science Reviews* 203:103176. DOI:  
572 10.1016/j.earscirev.2020.103176.
- 573 Dzik J. 1991. Evolution of oral apparatuses in the conodont chordates. *Acta Palaeontologica Polonica*  
574 36:265–323.
- 575 Dzik J. 2008. Evolution of morphogenesis in 360-million-year-old conodont chordates calibrated in days.  
576 *Evolution & Development* 10:769–777. DOI: 10.1111/j.1525-142X.2008.00291.x.
- 577 Dzik J. 2015. Evolutionary roots of the conodonts with increased number of elements in the apparatus.  
578 *Earth and Environmental Science Transactions of the Royal Society of Edinburgh* 106:29–53.
- 579 Dzik J. 2021. Protaspis larva of an aglaspigid-like arthropod from the Ordovician of Siberia and its  
580 habitat. *Arthropod Structure & Development* 61:101026. DOI: 10.1016/j.asd.2020.101026.
- 581 Epstein AG, Epstein JB, Harris LD. 1977. Conodont color alteration: an index to organic metamorphism.  
582 *United States Geological Survey Professional Paper* 995:1–27.
- 583 Foote M, Sepkoski JJ. 1999. Absolute measures of the completeness of the fossil record. *Nature* 398:415–  
584 417. DOI: 10.1038/18872.
- 585 Gabbott SE, Aldridge RJ, Theron JN. 1995. A giant conodont with preserved muscle tissue from the  
586 Upper Ordovician of South Africa. *Nature* 374:800–803. DOI: 10.1038/374800a0.
- 587 Ginot S, Goudemand N. 2019. Conodont size, trophic level, and the evolution of platform elements.  
588 *Paleobiology* 45:458–468. DOI: 10.1017/pab.2019.19.
- 589 Ginot S, Goudemand N. 2020. Global climate changes account for the main trends of conodont diversity  
590 but not for their final demise. *Global and Planetary Change* 195:103325. DOI:  
591 10.1016/j.gloplacha.2020.103325.
- 592 Gould SJ. 1966. Allometry and size in ontogeny and phylogeny. *Biological Reviews* 41:587–638. DOI:  
593 10.1111/j.1469-185X.1966.tb01624.x.
- 594 Guenser P, Souquet L, Dolédec S, Mazza M, Rigo M, Goudemand N. 2019. Deciphering the roles of  
595 environment and development in the evolution of a Late Triassic assemblage of conodont  
596 elements. *Paleobiology* 45:440–457. DOI: 10.1017/pab.2019.14.



- 597 Hayashi S. 1968. The Permian Conodonts in Chert of the Adoyama Formation, Ashio Mountains, Central  
598 Japan. *Earth Science* 2:63–77.
- 599 Jones D, Evans AR, Rayfield EJ, Siu KKW, Donoghue PCJ. 2012a. Testing microstructural adaptation in  
600 the earliest dental tools. *Biology Letters* 8:952–955. DOI: 10.1098/rsbl.2012.0487.
- 601 Jones D, Evans AR, Siu KKW, Rayfield EJ, Donoghue PCJ. 2012b. The sharpest tools in the box?  
602 Quantitative analysis of conodont element functional morphology. *Proceedings of the Royal  
603 Society B: Biological Sciences* 279:2849–2854. DOI: 10.1098/rspb.2012.0147.
- 604 Klingenberg CP. 1996. Multivariate Allometry. In: Marcus LF, Corti M, Loy A, Naylor GJP, Slice DE  
605 eds. *Advances in Morphometrics*. Boston, MA: Springer US, 23–49. DOI: 10.1007/978-1-4757-  
606 9083-2\_3.
- 607 Klug C, Kröger B, Kiessling W, Mullins GL, Servais T, Fryda J, Korn D, Turner S. 2010. The Devonian  
608 nekton revolution. *Lethaia* 43:465–477. DOI: 10.1111/j.1502-3931.2009.00206.x.
- 609 Lucas PW. 1979. The Dental-Dietary Adaptations of Mammals. *Neues Jahrbuch für Geologie und  
610 Paläontologie Monatshefte* 8:486–512.
- 611 Martínez-Pérez C, Cascales-Miñana B, Plasencia P, Botella H. 2015. Exploring the major depletions of  
612 conodont diversity during the Triassic. *Historical Biology* 27:503–507. DOI:  
613 10.1080/08912963.2014.890192.
- 614 Martínez-Pérez C, Plasencia P, Cascales-Miñana B, Mazza M, Botella H. 2014a. New insights into the  
615 diversity dynamics of Triassic conodonts. *Historical Biology* 26:591–602. DOI:  
616 10.1080/08912963.2013.808632.
- 617 Martínez-Pérez C, Plasencia P, Jones D, Kolar-Jurkovšek T, Sha J, Botella H, Donoghue PCJ. 2014b.  
618 There is no general model for occlusal kinematics in conodonts. *Lethaia* 47:547–555. DOI:  
619 10.1111/let.12080.
- 620 Martínez-Pérez C, Rayfield EJ, Botella H, Donoghue PCJ. 2016. Translating taxonomy into the evolution  
621 of conodont feeding ecology. *Geology* 44:247–250. DOI: 10.1130/G37547.1.

- 622 Martínez-Pérez C, Rayfield EJ, Purnell MA, Donoghue PCJ. 2014c. Finite element, occlusal, microwear  
623 and microstructural analyses indicate that conodont microstructure is adapted to dental function.  
624 *Palaeontology* 57:1059–1066. DOI: 10.1111/pala.12102.
- 625 Mazza M, Cau A, Rigo M. 2012. Application of numerical cladistic analyses to the Carnian–Norian  
626 conodonts: a new approach for phylogenetic interpretations. *Journal of Systematic Palaeontology*  
627 10:401–422.
- 628 Mazza M, Furin S, Spötl C, Rigo M. 2010. Generic turnovers of Carnian/Norian conodonts: Climatic  
629 control or competition? *Palaeogeography, Palaeoclimatology, Palaeoecology* 290:120–137.
- 630 Mazza M, Martínez-Pérez C. 2015. Unravelling conodont (Conodonta) ontogenetic processes in the Late  
631 Triassic through growth series reconstructions and X-ray microtomography. *Bollettino della*  
632 *Società Paleontologica Italiana* 54:161–186.
- 633 Mazza M, Nicora A, Rigo M. 2018. *Metapolygnathus parvus* Kozur, 1972 (Conodonta): a potential  
634 primary marker for the Norian GSSP (Upper Triassic). *Bollettino della Società Paleontologica*  
635 *Italiana*. DOI: 10.4435/BSPI.2018.06.
- 636 Mazza M, Rigo M, Gullo M. 2012. Taxonomy and biostratigraphic record of the Upper Triassic  
637 conodonts of the Pizzo Mondello section (western Sicily, Italy), GSSP candidate for the base of  
638 the Norian. *Rivista Italiana di Paleontologia e Stratigrafia* 118:85–130.
- 639 Nicoll RS. 1987. Form and function of the Pa element in the conodont animal. In: Aldridge RJ ed.  
640 *Palaeobiology of conodonts*. Chichester: Ellis Horwood, 77–90.
- 641 Nicora A, Balini M, Bellanca A, Bertinelli A, Bowring SA, Di Stefano P, Dumitrica P, Guaiumi C, Gullo  
642 M, Hungerbuehler A, others. 2007. The Carnian/Norian boundary interval at Pizzo Mondello  
643 (Sicani Mountains, Sicily) and its bearing for the definition of the GSSP of the Norian Stage.  
644 *Albertiana* 36:102–129.
- 645 Noyan ÖF, Kozur HW. 2007. Revision of the late Carnian–early Norian conodonts from the Stefanion  
646 section (Argolis, Greece) and their palaeobiogeographic implications. *Neues Jahrbuch für*  
647 *Geologie und Paläontologie-Abhandlungen* 245:159–178.

- 648 Pampush JD, Winchester JM, Morse PE, Vining AQ, Boyer DM, Kay RF. 2016. Introducing molaR: a  
649 New R Package for Quantitative Topographic Analysis of Teeth (and Other Topographic  
650 Surfaces). *Journal of Mammalian Evolution* 23:397–412. DOI: 10.1007/s10914-016-9326-0.
- 651 Petryshen W, Henderson CM, De Baets K, Jarochovska E. 2020. Evidence of parallel evolution in the  
652 dental elements of Sweetognathus conodonts. *Proceedings of the Royal Society B: Biological  
653 Sciences* 287:20201922. DOI: 10.1098/rspb.2020.1922.
- 654 Purnell MA. 1993. Feeding mechanisms in conodonts and the function of the earliest vertebrate hard  
655 tissues. *Geology* 21:375–377. DOI: 10.1130/0091-7613(1993)021<0375:FMICAT>2.3.CO;2.
- 656 Purnell MA. 1994. Skeletal ontogeny and feeding mechanisms in conodonts. *Lethaia* 27:129–138. DOI:  
657 10.1111/j.1502-3931.1994.tb01567.x.
- 658 Purnell MA. 1995. Microwear on conodont elements and macrophagy in the first vertebrates. *Nature*  
659 374:798–800. DOI: 10.1038/374798a0.
- 660 Purnell MA, von Bitter PH. 1992. Blade-shaped conodont elements functioned as cutting teeth. *Nature*  
661 359:629–631. DOI: 10.1038/359629a0.
- 662 Purnell MA, Donoghue PCJ, Aldridge RJ. 2000. Orientation and anatomical notation in conodonts.  
663 *Journal of Paleontology* 74:113–122. DOI: 10.1017/S0022336000031292.
- 664 R Core Team. 2021. R: A Language and Environment for Statistical Computing. *R Foundation for  
665 Statistical Computing, Vienna, Austria*.
- 666 Schmidt H. 1934. Conodonten-Funde in ursprünglichem Zusammenhang. *Palaeontologische Zeitschrift*  
667 16:76–85. DOI: 10.1007/BF03041668.
- 668 Scott HW. 1934. The zoological relationships of the conodonts. *Journal of Paleontology* 8:448–455.
- 669 Shirley B, Grohganz M, Bestmann M, Jarochovska E. 2018. Wear, tear and systematic repair: testing  
670 models of growth dynamics in conodonts with high-resolution imaging. *Proceedings of the Royal  
671 Society B: Biological Sciences* 285:20181614. DOI: 10.1098/rspb.2018.1614.

- 672 Spradley JP, Pampush JD, Morse PE, Kay RF. 2017. Smooth operator: The effects of different 3D mesh  
673 retriangulation protocols on the computation of Dirichlet normal energy. *American Journal of*  
674 *Physical Anthropology* 163:94–109. DOI: 10.1002/ajpa.23188.
- 675 Strait SG. 1997. Tooth use and the physical properties of food. *Evolutionary Anthropology: Issues, News,*  
676 *and Reviews* 5:199–211. DOI: 10.1002/(SICI)1520-6505(1997)5:6<199::AID-  
677 EVAN2>3.0.CO;2-8.
- 678 Warton DI, Duursma RA, Falster DS, Taskinen S. 2012. smatr 3– an R package for estimation and  
679 inference about allometric lines. *Methods in Ecology and Evolution* 3:257–259. DOI:  
680 10.1111/j.2041-210X.2011.00153.x.
- 681 Winchester JM, Boyer DM, St. Clair EM, Gosselin-Ildari AD, Cooke SB, Ledogar JA. 2014. Dental  
682 topography of platyrrhines and prosimians: Convergence and contrasts. *American Journal of*  
683 *Physical Anthropology* 153:29–44. DOI: 10.1002/ajpa.22398.
- 684 Zhang S, Aldridge RJ, Donoghue PCJ. 1997. An Early Triassic conodont with periodic growth? *J.*  
685 *Micropalaeontol.* 16:65–72. DOI: 10.1144/jm.16.1.65.
- 686 Zhang ZT, Sun YD, Wignall PB, Fu JL, Li HX, Wang MY, Lai XL. 2018. Conodont size reduction and  
687 diversity losses during the Carnian Humid Episode in SW China. *Journal of the Geological*  
688 *Society* 175:1027–1031.
- 689
