# 1 **Growth allometry and dental topography in Upper Triassic conodonts** 2 **support trophic differentiation and molar-like element function**

3

4 Valentin Kelz<sup>1</sup>, Pauline Guenser\*<sup>1</sup>, Manuel Rigo<sup>2</sup>, Emilia Jarochovska<sup>1, 3</sup>

5

6 <sup>1</sup> Fachgruppe Paläoumwelt, GeoZentrum Nordbayern, Friedrich-Alexander-Universität  
7 Erlangen-Nürnberg, Erlangen, Germany. [valentin.kelz@fau.de](mailto:valentin.kelz@fau.de); [pauline.guenser@gmail.com](mailto:pauline.guenser@gmail.com)

8 <sup>2</sup> Department of Geosciences, University of Padova, Padova, Veneto, Italy.

9 [manuel.rigo@unipd.it](mailto:manuel.rigo@unipd.it)

10 <sup>3</sup> Department of Earth Sciences, Utrecht University, Utrecht, Netherlands.

11 [e.b.jarochovska@uu.nl](mailto:e.b.jarochovska@uu.nl)

12

13 \*Corresponding Author

14 [mailto: pauline.guenser@gmail.com](mailto:pauline.guenser@gmail.com)

## 15 **Abstract**

16 Conodont elements are distinguished by their high morphological diversity and evolution, but  
17 their function has been few investigated. In particular, P<sub>1</sub> elements were proposed to be  
18 analogous to mammal molars based on a positive allometric relationship between their platform  
19 length/area and their total length, which was previously identified in Carboniferous taxa. Here  
20 we apply the same method to test the null hypothesis of isometric growth in two Late Triassic  
21 taxa, *Metapolygnathus communisti* and *Epigondolella rigoi*, using 3D models of growth series.  
22 We further test if these co-occurring taxa showed the same growth allometry, reflecting  
23 overlapping trophic niches. In both species platform length and platform area showed positive  
24 allometry with respect to element length, which is consistent with a molar-like function. The  
25 allometric relationship did not differ significantly between both Late Triassic taxa, which mean  
26 they rather occupy the same trophic niche. We further tested the overlap in the trophic niches  
27 using Dirichlet Normal Energy, a dental topographic analysis. Adult specimens of *E. rigoi*  
28 showed higher DNE values than *M. communisti*'s, consistent with a capacity to break harder  
29 food and so having a different diet. Based on DNE values available for primates, adult values for  
30 *E. rigoi* were similar to those reported for insectivores or folivores; for folivores or omnivores

31 for adults *M. communisti*. This means that these conodont species might have eaten food that  
32 required analogous breaking forces. Diet differentiation within this broad niche supports trophic  
33 diversification as an important driver of the remarkable disparity of conodont elements.

## 34 **Introduction**

35 Conodonts are extinct, eel-shaped marine animals that lived from the mid-Cambrian to Early  
36 Jurassic (Du et al. 2020). They are early vertebrates, either stem-gnathostomes (Donoghue et al.  
37 1998) or stem-cyclostomes (Miyashita et al. 2019), and they distinguished by an extensive fossil  
38 record (Foote and Sepkoski 1999; Donoghue 2001*a*). The majority of the conodont fossil record  
39 consists of the phosphatic elements forming the feeding apparatus of the animal (Schmidt 1934;  
40 Scott 1934; Purnell et al. 2000). Conodont elements were retained throughout the life of an  
41 individual (Donoghue and Purnell 1999*a*), recording periodic growth through the apposition of  
42 crown tissue lamellae (Zhang et al. 1997; Dzik 2008). Soft tissues are rarely found and have, so  
43 far, not revealed a great diversity of body forms. Because of this, conodont taxonomy and  
44 functional morphology are based on their elements (Mazza et al. 2012*b* for the Upper Triassic  
45 and references therein). Patterns interpreted to be produced by elements shearing on the surface  
46 and repaired during the animal's growth suggest macrophagy (Purnell 1995; Donoghue and  
47 Purnell 1999*a*; Shirley et al. 2018). An active, predatory lifestyle is supported by the discovery  
48 of a conodont specimen with preserved extrinsic eye musculature (Gabbott et al. 1995), which  
49 was interpreted as indicative of conodonts having pattern vision (Purnell 1994). Calcium isotope  
50 analyses indicated that Late Devonian conodonts were first-level zooplanktivore and piscivore  
51 consumers (Balter et al. 2019), suggesting that in this period, conodonts did not live a purely  
52 predatory lifestyle. However, and despite several publications related to this topic, the diet of  
53 conodonts and its evolution is far from being resolved.

54 Conodonts changed their apparatus structure and disparity across their stratigraphic range  
55 (Dzik 1991, 2015), possibly reflecting their evolving niches as marine ecosystems increased in  
56 complexity (Klug et al. 2010; Ginot and Goudemand 2019). Under the assumption that conodont  
57 element morphology is an adaptation to their diet (Jones et al. 2012*a*; Ginot and Goudemand  
58 2019; Guenser et al. 2019; Petryshen et al. 2020), the disparity suggests changing trophic  
59 position throughout the existence of the lineage. Calcium isotope analysis indicated that trophic  
60 niches overlapped, suggesting competition between some taxa (Balter et al. 2019). On the other

61 hand, Sr/Ca ratios in Silurian conodont assemblages indicate consistent differences between  
62 species (Terrill et al. 2022), possibly reflecting trophic niche differentiation through disruptive  
63 selection. Since there is no direct evidence of conodont food base, trophic diversity of conodonts  
64 must be inferred from proxies, e.g. by evaluating morphological and functional diversity of food-  
65 processing elements.

66 Several lines of argumentation have been proposed in support of elements of the conodont  
67 feeding apparatus having a tooth-like function. S and M elements, positioned in the anterior part,  
68 i.e. the mouth, are interpreted to perform a grasping function, whereas P elements, placed in the  
69 posterior part of the apparatus in the pharynx of the animal, have been proposed to have a  
70 function similar to molars of mammals (Purnell and von Bitter 1992; Purnell 1994; Donoghue  
71 and Purnell 1999*b*; Goudemand et al. 2011). A model of conodonts being suspension feeders has  
72 also been suggested (Nicoll 1987), where elements would be covered in tissue and S and M  
73 elements would filter particles and create current. P elements would only lightly mash food. This  
74 model, however, is not supported by more recent research: Shirley et al. (2018) suggested that  
75 tooth-like function in conodont elements may have only developed after a larval stage, during  
76 which they exhibited a different feeding habit, as mechanical wear of conodont elements is only  
77 present after a certain stage of ontogenetic development. After this stage, elements appear to  
78 have had prolonged intervals of dental use and short growth intervals, during which conodonts  
79 did not feed and their elements were covered in soft tissue, depositing new layers (Bengtson  
80 1976; Donoghue and Purnell 1999*a*; Shirley et al. 2018).

81 The following arguments have been proposed for the dental function of conodont elements:  
82 (1) the presence of microwear patterns on conodont elements, produced *in vivo* (Purnell 1995;  
83 Martínez-Pérez et al. 2014*a*); (2) occlusion models (Donoghue and Purnell 1999*b*; Jones et al.  
84 2012*a*; Martínez-Pérez et al. 2014*b, a*); (3) Finite Element Analysis (FEA) (Jones et al. 2012*b*;  
85 Martínez-Pérez et al. 2014*a*, 2016); (4) ultrastructural adaptation of conodont tissues to dental  
86 function, analogous to enamel (Donoghue 2001*b*; Jones et al. 2012*a*); (5) in some conodont taxa,  
87 extreme sharpness has been proposed to be an adaptation to cutting function in the absence of  
88 jaws acting as levers (Jones et al. 2012*b*); and the last argument, which is central in this study,  
89 (6) growth allometry (Purnell 1993, 1994).

90 Allometry describes proportional relationships of body parts, usually of the size of an organ to  
91 the total size of the organism. Proportional growth, whereby the growth of an organ and the size

92 of the animal increase at the same rate, is called isometry. Positive allometry then describes the  
93 organ growing at a higher rate than the rest of the animal. Negative allometry, conversely,  
94 describes the organ growing at a slower rate than the rest of the body (e.g., Gould 1966; Alberch  
95 et al. 1979; Klingenberg 1996). Tooth function is linked to surface area and the food  
96 requirements of an animal increase at a higher rate than an isometrically growing tooth (Gould  
97 1966). For conodonts, positive allometric growth of elements would be expected if conodont  
98 elements had a tooth-like function, specifically if P<sub>1</sub> elements were used like molars. This  
99 hypothesis was first tested with Carboniferous *Idiognathodus* sp. and *Gnathodus bilineatus*  
100 conodont elements (Purnell, 1993, 1994). In these studies, the author assessed the molar function  
101 of P<sub>1</sub> elements by testing positive allometric growth patterns of their platform regarding the total  
102 length of the element since this part of P<sub>1</sub> elements was hypothesised to be an occlusal surface.  
103 As P<sub>1</sub> elements are paired, opposed platform surfaces would mash/ground food between them.  
104 Here, we apply a similar protocol applied by Purnell (1993, 1994) for assessing the dental  
105 function of two Late Triassic platform-bearing conodont species *Metapolygnathus communisti*  
106 Hayashi, 1968 (Hayashi 1968) and *Epigondolella rigoi* Kozur, 2007 (Noyan and Kozur 2007),  
107 which co-occurred in the studied area (Mazza et al. 2012a). We also add a dental topographic  
108 analysis, the Dirichlet Normal Energy (DNE), which measures the curvature and morphological  
109 irregularity of a surface. Essentially, DNE measures how much a given surface differs from a  
110 plane (Bunn et al. 2011). Surface topography is an important feature of teeth because they help  
111 break down food (i.e. the demand of energy) and can be used to infer diet (Bunn et al. 2011).  
112 Then, a particular DNE value of the occlusal surface of a teeth (or tooth-like buccal elements in  
113 conodonts) reflects a particular diets. In contrast to allometry, DNE is a new tool and has, until  
114 now, been only used to analyse skeletal parts of mammals, especially primate teeth (Bunn et al.  
115 2011; Godfrey et al. 2012; Winchester et al. 2014; Prufrock et al. 2016; Berthaume and Schroer  
116 2017; López-Torres et al. 2018; Pampush et al. 2019; Fulwood 2020; Li et al. 2020; Cuesta-  
117 Torralvo et al. 2021), but also marsupials (Lang et al. 2022), carnivorans (hyenas, bears) (Pérez-  
118 Ramos et al. 2020; de Vries et al. 2021; Lang et al. 2022), scandentians (tree shrews) (Selig et al.  
119 2019), rodents (Prufrock et al. 2016; Renaud and Ledevin 2017; Vermeer 2019; de Vries et al.  
120 2021), chiropters (Pellegrom 2019; López-Aguirre et al. 2022; Villalobos-Chaves and Santana  
121 2022), multituberculates (Robson 2018), artiodactyls (suids) (Rannikko et al. 2020),  
122 eulipotyphles (hedgehogs) (Vitek et al. 2021) and one mammal stem group (Harper et al. 2019).

123 Moreover, only few of these authors used DNE values to directly infer animal's diet, most of  
124 them included DNE values in more complex multivariate analyses. Preliminary dental  
125 topographic analyses have been applied to conodont elements suggested that conodonts might  
126 have different diets through time (Purnell and Evans 2009; Stockey et al. 2021, 2022).

127 In this work, we address the hypothesis, originally tested by Purnell (1993), that conodont P<sub>1</sub>  
128 elements performed molar-like function and that this is reflected in the growth allometry of their  
129 surface *versus* length. The null hypothesis is that this relationship is isometric, what would be  
130 expected in filter feeders. In contrast to Purnell's (1993) study, which used projections of the  
131 surface on a plane, we use 3D meshes to calculate a more accurate platform area than is possible  
132 with a two-dimensional approximation. We further test the hypothesis that conodonts occupying  
133 the same environments had the same trophic position. To reject this hypothesis, slopes of the  
134 growth allometry of P<sub>1</sub> platform surface *versus* element length should differ. Under the  
135 assumption that P<sub>1</sub> platforms performed a molar-like function, we further hypothesise that the  
136 diets of studied species did not change during the ontogenetic growth of one species. This  
137 hypothesis is tested using DNE on platform elements, as most morphological variability between  
138 species is related to P<sub>1</sub> platform shape. Thus, platforms are inferred to reflect differences in their  
139 trophic positions (Jones et al. 2012b; Martínez-Pérez et al. 2016). Under the null hypothesis,  
140 DNE values are expected to increase with conodont size at the same rate. Differences in rates  
141 would suggest two possible explanations: (1) the diets changed across growth stages or (2) the  
142 energy demand of the two species changed at different rates during their ontogenies. Under the  
143 null hypothesis, the DNE values of the two species are expected to change at the same rate.  
144 Different rates of DNE increase across growth stages between the two species would falsify the  
145 hypothesis, indicating either a change of food base leading to different platform sharpness or a  
146 higher energy demand of the species with the higher rate of DNE increase.

## 147 **Materials & Methods**

### 148 **Material**

149 We studied two growth series of the ozarkodinid conodont species *Metapolygnathus*  
150 *communisti* and *Epigondolella rigoi* from the Pizzo Mondello section in western Sicily, Italy.  
151 They were collected from a section of 430 m thick marine limestone that is dated to the upper  
152 Carnian to upper Norian (Mazza et al. 2012a). Twenty-seven P<sub>1</sub> elements of *M. communisti* and

153 23 P<sub>1</sub> elements of *E. rigoi* were used, both separated into six growth stages (GS) based on the  
154 maturity of morphological characters of the platform (Mazza and Martínez-Pérez 2015). The six  
155 growth stages are GS1 – early juvenile, GS2 – juvenile, GS3 – late juvenile, GS4 – early adult,  
156 GS5 – adult and GS6 – late adult (Mazza and Martínez-Pérez 2015) (Table 1). At Pizzo  
157 Mondello, *M. communisti* occurs from the upper Carnian to the lower Norian (from c.a. -227.5  
158 Ma to c.a. -226.5 Ma) (Mazza et al. 2012a, 2018; Ogg et al. 2020). The specimens range from  
159 late juvenile to late adult (i.e., from GS3 to GS6), though mature elements are more abundant  
160 (Table 1). The stratigraphic range of *E. rigoi* at Pizzo Mondello is from the lower Norian to the  
161 middle Norian (from c.a. -227 Ma to c.a. -216 Ma) (Mazza et al. 2010, 2012a; Ogg et al. 2020), a  
162 longer interval than *M. communisti*. Elements range from GS2 to GS5, earlier ontogenetic stages  
163 are sparse (Table 1). These specimens have an average colour alteration index (CAI) of 1,  
164 suggesting minimal post-depositional heating (Epstein et al. 1977; Nicora et al. 2007; Mazza et  
165 al. 2012a). The studied elements are housed in the collection of the Dipartimento di Scienze  
166 della Terra “A. Desio” of the Università degli Studi di Milano. The whole conodont collection  
167 from the Pizzo Mondello section is housed in Milan and Padova (Department of Geosciences,  
168 University of Padova).

## 169 **Methods**

### 170 ***Scanning***

171 The specimens were scanned with a resolution of 1 µm with a microtomograph nanotomS  
172 (General Electric) of the AniRA-ImmOs platform, SFR Biosciences (UMS 3444), Ecole  
173 Normale Supérieure de Lyon, France. Amira© software was used for the 3D reconstruction  
174 (Guenser et al. 2019; **Figure 1**). The meshes are available on MorphoBank:  
175 <http://morphobank.org/permalink/?P4048>

### 176 ***Growth allometry***

177 The length of the element was used as a proxy for the size of the conodont animal, as was  
178 done in previous studies (Purnell 1993, 1994; Zhang et al. 2018; Ginot and Goudemand 2019).  
179 The element length, the platform length and the platform area were measured using the 3D  
180 software MeshLab (Cignoni et al. 2008). The length of the element was measured from the  
181 anteriormost point of the blade in a straight line to the middle of the posterior edge of the  
182 element’s platform. As the platform is not equally long on the two sides of the blade, its length

183 was measured in two ways. First, as most elements are curved, the convex side of the platform  
184 was measured. In *Metapolygnathus communisti*, the convex size tends to be the longer side of the  
185 platform, though not always. In *Epigondolella rigoi* the convex side was almost exclusively the  
186 longer side. Alternatively, the longest side of the platform was measured, regardless of curvature  
187 (Figure 2, see also Figure S1 in Supplementary Information). In *M. communisti*, in both  
188 instances, the platform was measured from the most anterior part of the platform to its posterior  
189 end in a line parallel to the imagined symmetrical axis of the platform (Figure 2). In *E. rigoi*, the  
190 platform was measured from the geniculation point to the platform's posterior end. This measure  
191 was chosen because the anterior trough margin in this species, though reduced, reaches quite far  
192 up the blade, especially in more mature growth stages (see Mazza et al. 2012a for details about  
193 the taxonomic characters).

194 The measured area of the platform includes the platform, the cusp and any postcarinal nodes  
195 (Figure 2). In *M. communisti*, specimens of earlier growth stages tend to exhibit only one  
196 postcarinal node, already present in GS1 (Mazza and Martínez-Pérez 2015). From GS3 on, a  
197 second posterior node may appear (Mazza and Martínez-Pérez 2015). Adult specimens show  
198 three or four posterior carinal nodes (Mazza et al. 2012a). However, our measurements  
199 consistently included only two or three postcarinal nodes in adult specimens. In *E. rigoi*, the cusp  
200 is always followed by a single larger postcarinal node (Mazza et al. 2012a). These parts of P<sub>1</sub>  
201 elements were added to the measurements of the platform area, even though they are  
202 taxonomically not part of the platform, because they likely played a similar part in the processing  
203 of food as the platform itself. In *E. rigoi*, the anterior trough margin was not included in the  
204 measurements of the platform area (Figure 2). The anterior trough margin is not present in *M.*  
205 *communisti* (Mazza et al. 2012a).

206 Reduced major axis regression (RMA) was calculated using the R package “smatr” 3.4-8  
207 (Warton et al. 2012; R Core Team 2021) to examine the relationship between the length of the  
208 platform and the length of the element, as well as the logarithm of the platform area and the  
209 length of the elements. The platform area was log-transformed to account for its increase as a  
210 square of the length of the element. RMA was chosen as a method because both variables are  
211 mutually dependent. Slopes obtained with *E. rigoi* and *M. communisti* data were compared with  
212 the “slope.com” function of the “smatr” R package. The same function was used to compare  
213 slopes related to the convex side and the longer side of the platform within a species. Slopes

214 between both species and isometry were compared with “slope.test” function of “smatr” R  
215 package. Isometry was modeled with a slope coefficient of 1 when testing the platform length vs.  
216 element length; a slope coefficient of 2 when testing the platform area vs. element length.

217 Purnell (1994) used a Z-test (Hayami and Matsukuma 1970) to test whether slope coefficients  
218 of *Idiognathodus* sp. and *Gnathodus bilineatus* differed significantly from isometric growth. A  
219 Z-index higher than 1.96 means that the relationship differs from isometry significantly. We  
220 consider this index comparable to the p-values we obtained for *M. communisti* and *E. rigoi* when  
221 comparing their slope coefficients with slopes expected under isometry. To compare slope  
222 coefficients from this study with those provided by Purnell (1994), 95% confidence intervals  
223 (95% CI) of slope coefficients of *Idiognathodus* sp. and *G. bilineatus* were calculated according  
224 to the following formula:

$$225 \quad \beta_1 = b_1 \pm t_{0.025, n-2} \times SE(b_1)$$

226 Where  $b_1$  is the slope coefficient,  $n$  is the number of measurements,  $t$  is the t distribution and  
227  $SE$  – standard error. Measurements for platform length of *G. bilineatus* were not available  
228 (Purnell 1994).

### 229 ***Quantitative topographic analysis (DNE)***

230 Dirichlet Normal Energy (DNE) measures a surface’s curvature and average sharpness (Bunn  
231 et al. 2011). The DNE of an object is independent of its size and orientation. Its equation is  
232 commonly written as follows:

$$233 \quad DNE = \sum e(p) \times area(p)$$

234 Here,  $e(p)$  is the Dirichlet Energy Density at a point  $p$ . The sum of the areas of all points  $p$   
235 (however small) on a surface is equal to the total area of the surface. Flat planes have DNE  
236 values of 0. Therefore, a higher DNE value expresses the elements’ complexity and the average  
237 “sharpness” of a surface (Bunn et al. 2011).

238 We applied the DNE on  $P_1$  element meshes with the R package “molaR” 5.0 (Pampush et al.  
239 2016). To ensure consistency of DNE calculation, all meshes were simplified to 10 000 faces  
240 (Spradley et al. 2017) using Quadric Edge Collapse Decimation in MeshLab. They were then  
241 rescaled so that each platform area equalled  $0.1 \text{ mm}^2$ . Meshes were then smoothed in Avizo  
242 using the Avizo smoothing function with  $\lambda = 0.6$  and 25 iterations. Twenty to thirty  
243 smoothing iterations, a conservative amount when compared to other approaches (Bunn et al.



244 2011; Winchester et al. 2014; Spradley et al. 2017), are recommended because they eliminate  
245 scanning noise while capturing fine-scale features and avoiding the creation of artificial dimples  
246 that can be caused by over smoothing (Spradley et al. 2017). Different numbers of iterations (5,  
247 10, 15, 20, 25, 30, 40, 50, 60, 70, 80, 90, and 100) were tested on a single specimen of *M.*  
248 *communisti* to determine the impact of the number of smoothing iterations (Figure S2). The DNE  
249 appears stable from ~20 to 25 iterations.

250 The meshes were then manually cut to keep the occluding surface of the platform, the cusp  
251 and the postcarinal nodes (Figure 3). Additionally, we cut out the aboral part of the platform  
252 because it does not take actively part in the food processing. The meshes were finally imported  
253 into R Software as binary *ply* files. Individual pieces of meshes created by the smoothing  
254 operation were removed to prevent them from affecting the DNE calculation. DNE was  
255 calculated with an included boundary exclusion criterion (BoundaryDiscard="vertex"), as  
256 advised by Spradley et al. (2017). The total surface DNE is the mean of all DNE values for  
257 individual faces of a surface (Pampush et al. 2016). Reduced major axis regression (RMA) was  
258 used to examine the relationship between DNE and the length of the platform and between DNE  
259 and the platform area in both species. Growth stage 5 (GS5) was chosen to compare DNE values  
260 between species because this stage comprised enough specimens from both species to allow  
261 statistical analysis (Table 1). GS5, representing adults, also allows for interpretations of the diet.  
262 The DNE distributions were compared with a Kruskal-Wallis test in R (Hollander and Wolfe  
263 1973).

264 The R code and data used for investigating allometric patterns and DNE are available on OSF  
265 at this address: [https://osf.io/283wq/?view\\_only=6f22274998134eb99cbe43749c6e3e7e](https://osf.io/283wq/?view_only=6f22274998134eb99cbe43749c6e3e7e) (Kelz et  
266 al. 2022).

## 267 **Results**

### 268 **Growth allometry**

269 In all examined relationships, high coefficients of determination ( $R^2 \geq 0.89$ ) indicated that  
270 linear regression captured the relationships between the variables sufficiently (Table 2). In  
271 *Metapolygnathus communisti*, linear regression slopes of the platform length over the  $P_1$  element  
272 length and of the platform area over the  $P_1$  element length showed positive allometry (Figure 4A-  
273 B). In both cases the slopes differed significantly from values corresponding to isometry, i.e. one

274 and two, respectively (Table 2). No differences between the two ways the platform length was  
275 measured could be detected ( $p=0.23$ ; Figure S1A).

276 In *Epigondolella rigoi*, both regression slopes (platform length over element length and platform  
277 area over element length) indicated positive allometry and were significantly higher than  
278 predicted under the null hypothesis of isometric growth (Table 2; Figure 4C-D). No significant  
279 difference between the two ways the platform length was measured could be detected ( $p=0.83$ ;  
280 Figure S1B).

281 Slope coefficients of the platform length over element length did not differ significantly  
282 between *M. communisti* and *E. rigoi* ( $p=0.166$ ), but in both cases they were significantly higher  
283 than that of *Idiognathodus* sp. as their confidence intervals did not overlap (Table 2, Figure 4E,  
284 G). Platform areas in all four species showed positive allometry over element length but at  
285 different rates: slope coefficients in *M. communisti* and *E. rigoi* were considerably higher than  
286 *Idiognathodus* sp. and *Gnathodus bilineatus* (2.561 and 2.392 vs. 2.149 and 2.164 respectively)  
287 but their 95% confident intervals overlapped and no significant difference was detected between  
288 *M. communisti* and *E. rigoi* ( $p=0.479$ ). Thus, no significant differences could be detected  
289 between the slopes in these four taxa (Table 2, Figure 4F-G).

## 290 **Dental topography (DNE)**

291 In *M. communisti*, DNE values ranged between 99.93 and 279.84; in *E. rigoi*, between 117.59  
292 and 353.71 (Figure 5). In *M. communisti* and *E. rigoi*, a positive linear relationship was detected  
293 between DNE values and platform length (Figure 5A, Table 3) and between DNE values and  
294 platform area (Figure 5B, Table 3). The regression slopes were supported by moderately high  
295 coefficients of determination ( $0.500 \leq R^2 \leq 0.621$ ; Table 3). In either case no significant  
296 differences between the two species could be found ( $p=0.15$  for DNE over platform length;  
297  $p=0.23$  for DNE over platform area).

298 Specimens classified as GS5 of *E. rigoi* showed higher DNE values than GS5 specimens of  
299 *M. communisti* (Kruskal-Wallis test,  $p=0.015$ ; Figure 5C).

## 300 **Discussion**

### 301 **Growth Allometry**

302 The null hypothesis of an isometric growth of P<sub>1</sub> elements in *M. communisti* and *E. rigoi*  
303 could be rejected based on positive growth allometry of the platform length and platform area

304 over element length. These results support previous findings of positive growth allometry in  
305 these organs in much older, Carboniferous, ozarkodinid taxa *G. bilineatus* and *Idiognathodus* sp.  
306 (Purnell 1993, 1994). They are consistent with the interpretation of P<sub>1</sub> elements as organs used  
307 for mechanical slicing and grinding of food, as previously proposed based on microwear (Purnell  
308 1995; Martínez-Pérez et al. 2014b), enamel-like ultrastructure of conodont lamellar crown tissue  
309 (Purnell et al. 2000), and finite element analysis (Jones et al. 2012a).

310 Our hypothesis that *M. communisti* and *E. rigoi* differed in the growth allometry of their P<sub>1</sub>  
311 elements as a reflection of occupying different trophic niches could not be rejected, as the  
312 difference in slopes was insignificant. Similar growth allometry might indicate similar trophic  
313 level, but different types of food processed within that level (see discussion of DNE results).  
314 Such partial overlaps of trophic niches of conodonts has been suggested in Silurian conodont  
315 communities based on geochemical proxies (Terrill et al. 2022).

316 Based on growth allometry implying platform length, we can reject the null hypothesis that  
317 Late Triassic species shared the same trophic position than the Carboniferous *Idiognathodus* sp.  
318 because their allometric slope coefficient differ significantly (Figure 4G). However, the same  
319 null hypothesis cannot be rejected considering the allometric growth of platform area. Indeed,  
320 3D measurement of platform areas (*M. communisti* and *E. rigoi*) resulted in higher regression  
321 slopes, but the difference was not significant (Table 2, Figure 4A). Perhaps this insignificant  
322 difference in slope coefficient resulted in the methodological difference in platform area  
323 measurement between Purnell (1993, 1994) and us. Indeed, measurements based on pictures  
324 suffer from distortions resulting from projecting on a plane, where differences in levelling the  
325 photographed specimens might affect the results. Nevertheless, a proper 3D measurements of P<sub>1</sub>  
326 platform area using our methodological protocol should be investigated in *Idiognathodus* sp.  
327 specimens to verify if there is any difference in allometric slope coefficients. Then, we cannot be  
328 certain that Late Triassic and Carboniferous species shared or not the same trophic position.  
329 However, as platform length showed a stronger positive allometry in Late Triassic taxa than  
330 found in *Idiognathodus* sp, it suggests that the increase of functional surface was primarily  
331 achieved in these taxa by platform elongation, rather than growth in width. The cause(s) of this  
332 ontogenetic pattern is not resolved here and is beyond the scope of this study but future research  
333 on the development of conodont elements will help to understand it.

334 **Platform sharpness**

335 In *M. communisti* and *E. rigoi*, DNE values differed at the adult growth stage (i.e., GS5) and  
336 the values increased approximately linearly with both platform length and platform area. The  
337 hypothesis that the rate of DNE increase remained the same throughout ontogeny could not,  
338 therefore, be rejected (Figure 5). This indicates that platform complexity increased at comparable  
339 rate in both species, suggesting that their food base or energy use did not change as they grew.  
340 This is different from the observation made in Silurian conodonts that they may have had a  
341 different feeding strategy during their larval stage (Shirley et al. 2018).

342 We compared DNE values between *M. communisti* and *E. rigoi* based only on values on GS5  
343 specimens because ontogenetically younger growth stages were represented by fewer specimens  
344 in both species (Table 1), which made observations of these stages less conclusive. A limitation  
345 of our analysis was that growth stages were differentiated based on morphology (i.e., size and  
346 presence/numbering of morphological characters), not sexual maturity. Thus, the classification of  
347 GS5 as “adult” does not consider biology, but the morphological maturity of the elements  
348 (Mazza and Martínez-Pérez 2015). However, GS5 is one of the more mature stages, so we can be  
349 confident on the maturity of the conodonts that bore these P<sub>1</sub> elements. Differences in DNE  
350 values between *M. communisti* and *E. rigoi* allow rejecting the hypothesis that both species  
351 shared the same diet. More DNE analyses on conodonts are needed to understand the scope of  
352 DNE values in this group and to confidently suggest that a discrepancy between DNE values of  
353 different species reflects different dietary niches. Indeed, DNE values of GS5 specimens of *M.*  
354 *communisti* are similar to those reported for folivores or omnivores; insectivores or folivores in  
355 the case of *E. rigoi*, but these diets based on DNE values stem from studies on primates (Bunn et  
356 al. 2011; Winchester et al. 2014). Moreover, conodont elements are more than ten time smaller  
357 than primate teeth, which complicate dietary comparison as conodonts could not eat exactly the  
358 same objects than primates. Though primate dietary classifications do not apply to conodonts,  
359 they may offer a general reference point for the methods of breaking down different food types.  
360 Insectivores rely on sharp cusps to apply maximal force to a small surface, to pierce hard insect  
361 chitin, and folivores also use steeply sloped cusps to shear tough cellulose-rich leaves (Lucas  
362 1979; Strait 1997). It is possible that conodont element platforms evolved to break down food  
363 types with similar properties. For instance, conodonts may have punctured arthropod larvae  
364 (Dzik 2021), which would be consistent with the DNE values observed in *M. communisti*.

365 The definition of the platform for DNE measurement is worth discussing because it is  
366 somewhat subjective. In this work, we decided to include the cusp and all postcarinal nodes  
367 because, in many cases, the cusp marked a notable transition between sharper denticles of the  
368 blade and flatter nodes on the platform. In *M. communisti*, the number of postcarinal nodes  
369 increases through growth (Mazza et al. 2012a; Mazza and Martínez-Pérez 2015), impacting DNE  
370 values through the ontogeny of this species. In *E. rigoi*, the number of posterior nodes stays the  
371 same (Mazza et al. 2012a) so variations of DNE values are more related to the growth of prior  
372 postcarinal nodes or the addition of new nodes on the edge of the platform. This difference in  
373 nodes location on the platform might affect the way conodonts break down food and so their diet  
374 but it should be further investigated by assessing occlusal kinematics of *M. communisti* and *E.*  
375 *rigoi* P<sub>1</sub> elements, which is currently impossible because no clusters is currently known for these  
376 species.

377 There are several challenges researchers face when working with DNE in conodonts. As DNE  
378 is a comparatively new tool, reference values and understanding of variability (e.g. intraspecific,  
379 ontogenetic and resulting from preservation) are limited. So far, DNE research has focused on  
380 mammals, whose tooth function is, in large part, reliant on jaws acting as levers. The different  
381 mechanics of feeding in jawed organisms necessitates that the comparisons drawn here between  
382 conodont elements and primate molars must be viewed as extremely hypothetical. Marine  
383 environment, evolutionary distance and the lack of jaws in conodonts make tooth function likely  
384 not completely analogous between the two. Even more importantly, conodonts are unique among  
385 vertebrates in repairing their teeth by periodic apposition of new growth layers on top of the ones  
386 previously used for food processing. Thus, tooth morphology is expected to change periodically  
387 during the life of the animal and this might results in fluctuations of DNE values in function of  
388 the moment of the feeding season. Typical applications of DNE do not take into account  
389 ontogenetic development (see references above in the Introduction). However, contrary to  
390 mammalian molars, the number of denticles in P<sub>1</sub> element platforms increases during ontogenetic  
391 growth in conodonts. This variable morphology plays into the problem of what to include in the  
392 conodont platform, which also has an impact on the calculation and reproducibility of DNE. A  
393 consistent protocol of mesh preparation before DNE calculation is also needed. For example, the  
394 scan resolution and the number of smoothing iterations vary in current literature and this can  
395 impact DNE results (Spradley et al. 2017; Assemat et al. 2022). This variation in processing is

396 important because comparisons are most conclusive when drawn between data with similar  
397 preparation. We second the recommendations by Spradley et al. (2017): a conservative number  
398 of smoothing iterations (20-30) using non-Laplace-based smoothing operators, such as that  
399 implemented in Avizo, and mesh simplification to a fixed number of faces. About the scan  
400 resolution, it depends on the size of the studied object. We cannot expect a 1  $\mu\text{m}$  resolution (as  
401 for conodont P<sub>1</sub> elements from the Pizzo Mondello (Guenser et al. 2019)), for mammal teeth of  
402 several mm in length. However, we can set a standardised scan resolution for conodonts  
403 elements of 1  $\mu\text{m}$  (even lower would be better), which would allow investigating ontogenetic  
404 patterns by including P<sub>1</sub> elements of less than 400  $\mu\text{m}$  in length (i.e., juveniles).

405 Previous investigations showed that dental topography methods could be applied to non-  
406 homologous dental tools to track dietary differences between distantly related clades (Stockey et  
407 al. 2021). Conodont elements in this study showed similar sharpness to complex mammal teeth.  
408 This similarity does not mean that direct dietary associations can be made between conodonts  
409 and mammals, but dental topography allows comparisons between taxa and ontogenetic stages  
410 and helps in constraining conodont ecology (Purnell and Evans 2009).

## 411 **Conclusions**

412 We used 3D meshes to test the null hypothesis that Late Triassic conodont P<sub>1</sub> elements grew  
413 isometrically. We tested it against the alternative hypothesis that they showed positive allometry,  
414 which would imply that they performed molar-like function. We followed Purnell's protocol  
415 (1993, 1994), analysing the growth allometry of the platform length and area vs. total length of  
416 the element, originally performed on 2D projections of conodont elements. We further used  
417 slopes of these allometric relationships to test the hypothesis that conodonts occupying the same  
418 environments shared the same trophic positions. Platform length and platform area showed  
419 positive allometry with respect to element length, allowing us to reject the null hypothesis in  
420 support of conodont growth consistent with molar-like function. Slope coefficients did not differ  
421 between *M. communisti* and *E. rigoi*. However, for platform length over element length slope  
422 coefficients were higher than those reported for Carboniferous conodonts *Idiognathodus* sp.  
423 (Purnell 1994). A more precise measurement of surface area in 3D models compared to 2D  
424 projections used in *Idiognathodus* sp. did not result in a significantly different relationship. In

425 contrast, length- rather than area-based measurements allowed detecting significant differences  
426 between Late Triassic taxa and *Idiognathodus* sp.

427 We added dental topographic analysis of the platforms using DNE to test the hypotheses that  
428 the diets of *M. communisti* and *E. rigoi* did not change during ontogenetic growth and that they  
429 occupied the same dietary niches. Surface DNE values increased linearly at the same rate as a  
430 function of element length and platform area, indicating no ontogenetic changes. *E. rigoi*  
431 specimens showed significantly higher DNE values than *M. communisti* specimens when  
432 comparing adult growth stages. Based on DNE values available for primates, those of the adult  
433 growth stages of *E. rigoi* were similar to those reported for insectivores or folivores, folivores or  
434 omnivores in the case of *M. communisti*.

435 Previous studies applying morphological and ultrastructural proxies for the dietary position of  
436 conodonts addressed mostly stratigraphically older conodont taxa, but our results indicate that  
437 Late Triassic species occupied the predator/scavenger niche. We also show that co-occurring  
438 taxa differed in their diets within this broad niche, which supports trophic diversification as an  
439 important driver of the remarkable disparity of their elements.

## 440 **Acknowledgements**

441 We thank Bryan Shirley for support in using Aviso and Wyatt Petryshen for advice on  
442 cleaning and saving meshes. We also thank Michele Mazza for advices and field sampling. We  
443 finally thank Nicolas Goudemand for supporting the project (French ANR grant, ACHN project  
444 EvoDevOdonto). PG was supported by Visiting Scholarship awarded by Friedrich-Alexander-  
445 Universität Erlangen-Nürnberg. EJ was supported by Deutsche Forschungsgemeinschaft (project  
446 no JA 2718/3-1). MR was supported by DOR2054230/20 by University of Padova. We are  
447 grateful to Viktor Karádi, Nicolas Campione and Paleobiology Editor James Crampton for  
448 constructive comments, which improved the manuscript.

## 449 **Literature cited**

450 Alberch, P., S. J. Gould, G. F. Oster, and D. B. Wake. 1979: Size and shape in ontogeny and  
451 phylogeny. *Paleobiology* 5:296–317.  
452 Assemat, A., G. Thiery, T. Lieffroy, and C. Girard. 2022: 3D topography as tool for shape  
453 discrimination of conodont elements. Fifth International Conodont Symposium (ICOS5).  
454 Balter, V., J. E. Martin, T. Tacail, G. Suan, S. Renaud, and C. Girard. 2019: Calcium stable  
455 isotopes place Devonian conodonts as first level consumers. *Geochemical Perspectives*  
456 *Letters* 10:36–39.

- 457 Bengtson, S. 1976: The structure of some Middle Cambrian conodonts, and the early evolution  
458 of conodont structure and function. *Lethaia* 9:185–206.
- 459 Berthaume, M. A., and K. Schroer. 2017: Extant ape dental topography and its implications for  
460 reconstructing the emergence of early Homo. *Journal of Human Evolution* 112:15–29.
- 461 Bunn, J. M., D. M. Boyer, Y. Lipman, E. M. St. Clair, J. Jernvall, and I. Daubechies. 2011:  
462 Comparing Dirichlet normal surface energy of tooth crowns, a new technique of molar  
463 shape quantification for dietary inference, with previous methods in isolation and in  
464 combination. *American Journal of Physical Anthropology* 145:247–261.
- 465 Cignoni, P., M. Callieri, M. Corsini, M. Dellepiane, F. Ganovelli, and G. Ranzuglia. 2008:  
466 Meshlab: an open-source mesh processing tool. *Eurographics Italian Chapter Conference*  
467 2008:129–136.
- 468 Cuesta-Torralvo, E., D. Pacheco, L. M. Martínez, A. Romero, C. Umbelino, Y. Avià, and A.  
469 Pérez-Pérez. 2021: Three-dimensional proxies to dental wear characterization in a known  
470 age-at-death skeletal collection. *Journal of Archaeological Method and Theory* 28:1261–  
471 1275.
- 472 Donoghue, P. C. J. 2001a: Conodonts meet cladistics: recovering relationships and assessing the  
473 completeness of the conodont fossil record. *Palaeontology* 44:65–93.
- 474 ———. 2001b: Microstructural variation in conodont enamel is a functional adaptation.  
475 *Proceedings of the Royal Society of London. Series B: Biological Sciences* 268:1691–  
476 1698.
- 477 Donoghue, P. C. J., and M. A. Purnell. 1999a: Growth, function, and the conodont fossil record.  
478 *Geology* 27:251–254.
- 479 ———. 1999b: Mammal-like occlusion in conodonts. *Paleobiology* 25:58–74.
- 480 Donoghue, P. C. J., M. A. Purnell, and R. J. Aldridge. 1998: Conodont anatomy, chordate  
481 phylogeny and vertebrate classification. *Lethaia* 31:211–219.
- 482 Du, Y., M. Chiari, V. Karádi, A. Nicora, T. Onoue, J. Pálffy, G. Roghi, Y. Tomimatsu, and M.  
483 Rigo. 2020: The asynchronous disappearance of conodonts: New constraints from  
484 Triassic-Jurassic boundary sections in the Tethys and Panthalassa. *Earth-Science*  
485 *Reviews* 203:103176.
- 486 Dzik, J. 1991: Evolution of oral apparatuses in the conodont chordates. *Acta Palaeontologica*  
487 *Polonica* 36:265–323.
- 488 ———. 2008: Evolution of morphogenesis in 360-million-year-old conodont chordates  
489 calibrated in days. *Evolution & Development* 10:769–777.
- 490 ———. 2015: Evolutionary roots of the conodonts with increased number of elements in the  
491 apparatus. *Earth and Environmental Science Transactions of the Royal Society of*  
492 *Edinburgh* 106:29–53.
- 493 ———. 2021: Protaspis larva of an aglaspigid-like arthropod from the Ordovician of Siberia and  
494 its habitat. *Arthropod Structure & Development* 61:101026.
- 495 Epstein, A. G., J. B. Epstein, and L. D. Harris. 1977: Conodont color alteration: an index to  
496 organic metamorphism. *United States Geological Survey Professional Paper* 995:1–27.
- 497 Foote, M., and J. J. Sepkoski. 1999: Absolute measures of the completeness of the fossil record.  
498 *Nature* 398:415–417.
- 499 Fulwood, E. L. 2020: Ecometric modelling of tooth shape and precipitation gradients among  
500 lemurs on Madagascar. *Biological Journal of the Linnean Society* 129:26–40.
- 501 Gabbott, S. E., R. J. Aldridge, and J. N. Theron. 1995: A giant conodont with preserved muscle  
502 tissue from the Upper Ordovician of South Africa. *Nature* 374:800–803.



- 503 Ginot, S., and N. Goudemand. 2019: Conodont size, trophic level, and the evolution of platform  
504 elements. *Paleobiology* 45:458–468.
- 505 Godfrey, L. R., J. M. Winchester, S. J. King, D. M. Boyer, and J. Jernvall. 2012: Dental  
506 topography indicates ecological contraction of lemur communities. *American Journal of*  
507 *Physical Anthropology* 148:215–227.
- 508 Goudemand, N., M. J. Orchard, S. Urdy, H. Bucher, and P. Tafforeau. 2011: Synchrotron-aided  
509 reconstruction of the conodont feeding apparatus and implications for the mouth of the  
510 first vertebrates. *Proceedings of the National Academy of Sciences* 108:8720–8724.
- 511 Gould, S. J. 1966: Allometry and size in ontogeny and phylogeny. *Biological Reviews* 41:587–  
512 638.
- 513 Guenser, P., L. Souquet, S. Dolédec, M. Mazza, M. Rigo, and N. Goudemand. 2019:  
514 Deciphering the roles of environment and development in the evolution of a Late Triassic  
515 assemblage of conodont elements. *Paleobiology* 45:440–457.
- 516 Harper, T., A. Parras, and G. W. Rougier. 2019: *Reigitherium* (Meridiolestida, Mesungulatoidea)  
517 an enigmatic Late Cretaceous mammal from Patagonia, Argentina: morphology,  
518 affinities, and dental evolution. *Journal of Mammalian Evolution* 26:447–478.
- 519 Hayami, I., and A. Matsukuma. 1970: Variation of bivariate characters from the standpoint of  
520 allometry. *Palaeontology* 13:588–605.
- 521 Hayashi, S. 1968: The Permian conodonts in chert of the Adoyama Formation, Ashio Mountains,  
522 central Japan. *Earth Science* 2:63–77.
- 523 Hollander, M., and D. A. Wolfe. 1973: Nonparametric statistical methods. Vol. 751. John Wiley  
524 & Sons, p.
- 525 Jones, D., A. R. Evans, E. J. Rayfield, K. K. W. Siu, and P. C. J. Donoghue. 2012a: Testing  
526 microstructural adaptation in the earliest dental tools. *Biology Letters* 8:952–955.
- 527 Jones, D., A. R. Evans, K. K. W. Siu, E. J. Rayfield, and P. C. J. Donoghue. 2012b: The sharpest  
528 tools in the box? Quantitative analysis of conodont element functional morphology.  
529 *Proceedings of the Royal Society B: Biological Sciences* 279:2849–2854.
- 530 Kelz, V., P. Guenser, M. Rigo, and E. Jarochowska. 2022: Growth allometry and dental  
531 topography in Upper Triassic conodonts support trophic differentiation and molar-like  
532 element function. Dataset retrieved from [osf.io/283wq](https://osf.io/283wq).
- 533 Klingenberg, C. P. 1996: Multivariate Allometry. Pp.23–49 in L. F. Marcus, M. Corti, A. Loy,  
534 G. J. P. Naylor, and D. E. Slice, eds. *Advances in Morphometrics*. Springer US, Boston,  
535 MA.
- 536 Klug, C., B. Kröger, W. Kiessling, G. L. Mullins, T. Servais, J. Fryda, D. Korn, and S. Turner.  
537 2010: The Devonian nekton revolution. *Lethaia* 43:465–477.
- 538 Lang, A. J., T. Engler, and T. Martin. 2022: Dental topographic and three-dimensional geometric  
539 morphometric analysis of carnassialization in different clades of carnivorous mammals  
540 (Dasyuromorphia, Carnivora, Hyaenodonta). *Journal of Morphology* 283:91–108.
- 541 Li, P., P. E. Morse, and R. F. Kay. 2020: Dental topographic change with macrowear and dietary  
542 inference in *Homunculus patagonicus*. *Journal of Human Evolution* 144:102786.
- 543 López-Aguirre, C., S. J. Hand, N. B. Simmons, and M. T. Silcox. 2022: Untangling the  
544 ecological signal in the dental morphology in the bat superfamily Noctilionoidea. *Journal*  
545 *of Mammalian Evolution*.
- 546 López-Torres, S., K. R. Selig, K. A. Prufrock, D. Lin, and M. T. Silcox. 2018: Dental  
547 topographic analysis of paromomyid (Plesiadapiformes, Primates) cheek teeth: more than

- 548 15 million years of changing surfaces and shifting ecologies. *Historical Biology* 30:76–  
549 88.
- 550 Lucas, P. W. 1979: The Dental-Dietary Adaptations of Mammals. *Neues Jahrbuch für Geologie*  
551 *und Paläontologie Monatshefte* 8:486–512.
- 552 Martínez-Pérez, C., E. J. Rayfield, M. A. Purnell, and P. C. J. Donoghue. 2014a: Finite element,  
553 occlusal, microwear and microstructural analyses indicate that conodont microstructure is  
554 adapted to dental function. *Palaeontology* 57:1059–1066.
- 555 Martínez-Pérez, C., E. J. Rayfield, H. Botella, and P. C. J. Donoghue. 2016: Translating  
556 taxonomy into the evolution of conodont feeding ecology. *Geology* 44:247–250.
- 557 Martínez-Pérez, C., P. Plasencia, D. Jones, T. Kolar-Jurkovšek, J. Sha, H. Botella, and P. C. J.  
558 Donoghue. 2014b: There is no general model for occlusal kinematics in conodonts.  
559 *Lethaia* 47:547–555.
- 560 Mazza, M., and C. Martínez-Pérez. 2015: Unravelling conodont (Conodonta) ontogenetic  
561 processes in the Late Triassic through growth series reconstructions and X-ray  
562 microtomography. *Bollettino della Società Paleontologica Italiana* 54:161–186.
- 563 Mazza, M., M. Rigo, and M. Gullo. 2012a: Taxonomy and biostratigraphic record of the Upper  
564 Triassic conodonts of the Pizzo Mondello section (western Sicily, Italy), GSSP candidate  
565 for the base of the Norian. *Rivista Italiana di Paleontologia e Stratigrafia* 118:85–130.
- 566 Mazza, M., A. Cau, and M. Rigo. 2012b: Application of numerical cladistic analyses to the  
567 Carnian–Norian conodonts: a new approach for phylogenetic interpretations. *Journal of*  
568 *Systematic Palaeontology* 10:401–422.
- 569 Mazza, M., A. Nicora, and M. Rigo. 2018: *Metapolygnathus parvus* Kozur, 1972 (Conodonta): a  
570 potential primary marker for the Norian GSSP (Upper Triassic). *Bollettino della Società*  
571 *Paleontologica Italiana*.
- 572 Mazza, M., S. Furin, C. Spötl, and M. Rigo. 2010: Generic turnovers of Carnian/Norian  
573 conodonts: Climatic control or competition? *Palaeogeography, Palaeoclimatology,*  
574 *Palaeoecology* 290:120–137.
- 575 Miyashita, T., Coates Michael I., Farrar Robert, Larson Peter, Manning Phillip L., Wogelius Roy  
576 A., Edwards Nicholas P., Anné Jennifer, Bergmann Uwe, Palmer A. Richard, and Currie  
577 Philip J. 2019: Hagfish from the Cretaceous Tethys Sea and a reconciliation of the  
578 morphological–molecular conflict in early vertebrate phylogeny. *Proceedings of the*  
579 *National Academy of Sciences* 116:2146–2151.
- 580 Nicoll, R. S. 1987: Form and function of the Pa element in the conodont animal. Pp.77–90 in R.  
581 J. Aldridge, ed. *Palaeobiology of Conodonts*. Ellis Horwood, Chichester.
- 582 Nicora, A., M. Balini, A. Bellanca, A. Bertinelli, S. A. Bowring, P. Di Stefano, P. Dumitrica, C.  
583 Guaiumi, M. Gullo, A. Hungerbuehler, and others. 2007: The Carnian/Norian boundary  
584 interval at Pizzo Mondello (Sicani Mountains, Sicily) and its bearing for the definition of  
585 the GSSP of the Norian Stage. *Albertiana* 36:102–129.
- 586 Noyan, Ö. F., and H. W. Kozur. 2007: Revision of the late Carnian–early Norian conodonts from  
587 the Stefanion section (Argolis, Greece) and their palaeobiogeographic implications.  
588 *Neues Jahrbuch für Geologie und Paläontologie-Abhandlungen* 245:159–178.
- 589 Ogg, J. G., Z.-Q. Chen, M. J. Orchard, and H. S. Jiang. 2020: Chapter 25 - The Triassic Period.  
590 Pp.903–953 in F. M. Gradstein, J. G. Ogg, M. D. Schmitz, and G. M. Ogg, eds. *Geologic*  
591 *Time Scale 2020*. Elsevier.

- 592 Pampush, J. D., J. M. Winchester, P. E. Morse, A. Q. Vining, D. M. Boyer, and R. F. Kay. 2016:  
593 Introducing molaR: a New R Package for Quantitative Topographic Analysis of Teeth  
594 (and Other Topographic Surfaces). *Journal of Mammalian Evolution* 23:397–412.
- 595 Pampush, J. D., J. Crowell, A. Karme, S. A. Macrae, R. F. Kay, and P. S. Ungar. 2019:  
596 Technical note: Comparing dental topography software using platyrrhine molars.  
597 *American Journal of Physical Anthropology* 169:179–185.
- 598 Pellegrom, C. 2019: Dental topographic analysis of maxillary and mandibular phyllostomid bat  
599 dentitions: implications for dietary prediction in the fossil record. Masters Theses.
- 600 Pérez-Ramos, A., A. Romero, E. Rodriguez, and B. Figueirido. 2020: Three-dimensional dental  
601 topography and feeding ecology in the extinct cave bear. *Biology Letters* 16:20200792.
- 602 Petryshen, W., C. M. Henderson, K. De Baets, and E. Jarochowska. 2020: Evidence of parallel  
603 evolution in the dental elements of *Sweetognathus* conodonts. *Proceedings of the Royal*  
604 *Society B: Biological Sciences* 287:20201922.
- 605 Prufrock, K. A., S. López-Torres, M. T. Silcox, and D. M. Boyer. 2016: Surfaces and spaces:  
606 troubleshooting the study of dietary niche space overlap between North American stem  
607 primates and rodents. *Surface Topography: Metrology and Properties* 4:024005.
- 608 Purnell, M. A. 1993: Feeding mechanisms in conodonts and the function of the earliest  
609 vertebrate hard tissues. *Geology* 21:375–377.
- 610 ———. 1994: Skeletal ontogeny and feeding mechanisms in conodonts. *Lethaia* 27:129–138.
- 611 ———. 1995: Microwear on conodont elements and macrophagy in the first vertebrates. *Nature*  
612 374:798–800.
- 613 Purnell, M. A., and P. H. von Bitter. 1992: Blade-shaped conodont elements functioned as  
614 cutting teeth. *Nature* 359:629–631.
- 615 Purnell, M. A., and A. Evans. 2009: Conodont tooth complexity: quantification, convergence  
616 with mammals, and implications for dietary analysis. 53:39–40.
- 617 Purnell, M. A., P. C. J. Donoghue, and R. J. Aldridge. 2000: Orientation and anatomical notation  
618 in conodonts. *Journal of Paleontology* 74:113–122.
- 619 R Core Team. 2021: R: a language and environment for statistical computing. R Foundation for  
620 Statistical Computing, Vienna, Austria.
- 621 Rannikko, J., H. Adhikari, A. Karme, I. Žliobaitė, and M. Fortelius. 2020: The case of the grass-  
622 eating suids in the Plio-Pleistocene Turkana Basin: 3D dental topography in relation to  
623 diet in extant and fossil pigs. *Journal of Morphology* 281:348–364.
- 624 Renaud, S., and R. Ledevin. 2017: Impact of wear and diet on molar row geometry and  
625 topography in the house mouse. *Archives of Oral Biology* 81:31–40.
- 626 Robson, S. V. 2018: An analysis of North American taeniolabidoid multituberculate (Mammalia,  
627 Allotheria) dentitions using mammalian dietary proxies. Masters Theses, University of  
628 Calgary, Calgary, Alberta.
- 629 Schmidt, H. 1934: Conodonten-Funde in ursprünglichem Zusammenhang. *Palaeontologische*  
630 *Zeitschrift* 16:76–85.
- 631 Scott, H. W. 1934: The zoological relationships of the conodonts. *Journal of Paleontology*  
632 8:448–455.
- 633 Selig, K. R., S. López-Torres, E. J. Sargis, and M. T. Silcox. 2019: First 3D dental topographic  
634 analysis of the enamel-dentine junction in non-primate euarchontans: contribution of the  
635 enamel-dentine junction to molar morphology. *Journal of Mammalian Evolution* 26:587–  
636 598.

- 637 Shirley, B., M. Grohgan, M. Bestmann, and E. Jarochowska. 2018: Wear, tear and systematic  
638 repair: testing models of growth dynamics in conodonts with high-resolution imaging.  
639 *Proceedings of the Royal Society B: Biological Sciences* 285:20181614.
- 640 Spradley, J. P., J. D. Pampush, P. E. Morse, and R. F. Kay. 2017: Smooth operator: The effects  
641 of different 3D mesh retriangulation protocols on the computation of Dirichlet normal  
642 energy. *American Journal of Physical Anthropology* 163:94–109.
- 643 Stockey, C., P. C. J. Donoghue, T. H. P. Harvey, D. J. E. Murdock, and M. A. Purnell. 2021:  
644 Multivariate dental topographic metrics demonstrate the dietary breadth and specialisms  
645 of conodonts. :46–47.
- 646 Stockey, C., P. C. J. Donoghue, T. H. P. Harvey, D. J. E. Murdock, and M. A. Purnell. 2022:  
647 Multivariate dental topographic metrics demonstrate the dietary breadth and specialisms  
648 of conodonts. .
- 649 Strait, S. G. 1997: Tooth use and the physical properties of food. *Evolutionary Anthropology:*  
650 *Issues, News, and Reviews* 5:199–211.
- 651 Terrill, D. F., E. Jarochowska, C. M. Henderson, B. Shirley, and O. Bremer. 2022: Sr/Ca and  
652 Ba/Ca ratios support trophic partitioning within a Silurian conodont community from  
653 Gotland, Sweden. *Paleobiology*:1–21.
- 654 Vermeer, H. 2019: The association between dietary niche variation in rodents and climate  
655 change across the Paleocene-Eocene Thermal Maximum. Masters Theses, Grand Valley  
656 State University.
- 657 Villalobos-Chaves, D., and S. E. Santana. 2022: Craniodental traits predict feeding performance  
658 and dietary hardness in a community of Neotropical free-tailed bats (Chiroptera:  
659 Molossidae). *Functional Ecology* 36:1690–1699.
- 660 Vitek, N. S., P. E. Morse, D. M. Boyer, S. G. Strait, and J. I. Bloch. 2021: Evaluating the  
661 responses of three closely related small mammal lineages to climate change across the  
662 Paleocene–Eocene thermal maximum. *Paleobiology* 47:464–486.
- 663 de Vries, D., S. Heritage, M. R. Borths, H. M. Sallam, and E. R. Seiffert. 2021: Widespread loss  
664 of mammalian lineage and dietary diversity in the early Oligocene of Afro-Arabia.  
665 *Communications Biology* 4:1172.
- 666 Warton, D. I., R. A. Duursma, D. S. Falster, and S. Taskinen. 2012: smatr 3– an R package for  
667 estimation and inference about allometric lines. *Methods in Ecology and Evolution*  
668 3:257–259.
- 669 Winchester, J. M., D. M. Boyer, E. M. St. Clair, A. D. Gosselin-Ildari, S. B. Cooke, and J. A.  
670 Ledogar. 2014: Dental topography of platyrrhines and prosimians: Convergence and  
671 contrasts. *American Journal of Physical Anthropology* 153:29–44.
- 672 Zhang, S., R. J. Aldridge, and P. C. J. Donoghue. 1997: An Early Triassic conodont with  
673 periodic growth? *J. Micropalaeontol.* 16:65–72.
- 674 Zhang, Z. T., Y. D. Sun, P. B. Wignall, J. L. Fu, H. X. Li, M. Y. Wang, and X. L. Lai. 2018:  
675 Conodont size reduction and diversity losses during the Carnian Humid Episode in SW  
676 China. *Journal of the Geological Society* 175:1027–1031.

677

678 **Table captions**

679 Table 1: Numbers of conodont P1 element specimens by growth stages used for the study.

680 Abbreviations: GS – Growth stage.

|     | <i>Metapolygnathus communisti</i> | <i>Epigondolella rigoi</i> |
|-----|-----------------------------------|----------------------------|
| GS2 | 0                                 | 1                          |
| GS3 | 3                                 | 1                          |
| GS4 | 2                                 | 6                          |
| GS5 | 7                                 | 15                         |
| GS6 | 15                                | 0                          |

681

682 Table 2: Linear regressions for platform length and platform area over element length for  
 683 *Metapolygnathus communisti*, *Epigondolella rigoi*, *Idiognathodus* sp. and *Gnathodus bilineatus*.  
 684 Data for *Idiognathodus* sp. and *G. bilineatus* were extracted from Purnell (1994) except for the  
 685 95% confidence intervals (CI). Slope coefficients and R<sup>2</sup> result from Reduced Major Axis  
 686 method. 95% CI values resulting from “sma” function calculation for *M. communisti* and *E.*  
 687 *rigoi*; from calculation for *Idiognathodus* sp. and *G. bilineatus*. The p-value results from the  
 688 “slope.test” function that compared the coefficients between species and isometry for *M.*  
 689 *communisti* and *E. rigoi*; from Z test (Hayami and Matsukuma 1970) for *Idiognathodus* sp. and  
 690 *G. bilineatus*.

| Regression model              | Species                           | Slope | Slope 95% CI lower value | Slope 95% CI upper value | R <sup>2</sup> | p-value (h <sub>0</sub> = isometric growth) |
|-------------------------------|-----------------------------------|-------|--------------------------|--------------------------|----------------|---------------------------------------------|
| PF length over element length | <i>Metapolygnathus communisti</i> | 1.580 | 1.402                    | 1.781                    | 0.92           | 1.740×10 <sup>-8</sup>                      |
|                               | <i>Epigondolella rigoi</i>        | 1.403 | 1.238                    | 1.590                    | 0.92           | 1.101×10 <sup>-5</sup>                      |
|                               | <i>Idiognathodus</i> sp.          | 1.089 | 1.011                    | 1.167                    | 0.98           | 2.345 (Z test)                              |
| PF area over element length   | <i>Metapolygnathus communisti</i> | 2.561 | 2.230                    | 2.940                    | 0.89           | 1.039×10 <sup>-3</sup>                      |
|                               | <i>Epigondolella rigoi</i>        | 2.392 | 2.080                    | 2.750                    | 0.90           | 1.443×10 <sup>-2</sup>                      |
|                               | <i>Idiognathodus</i> sp.          | 2.149 | 2.002                    | 2.296                    | 0.98           | 2.060 (Z test)                              |
|                               | <i>Gnathodus bilineatus</i>       | 2.164 | 2.020                    | 2.308                    | 0.98           | 2.329 (Z test)                              |

691

692 Table 3: Linear regressions for DNE values over element length and platform area for  
693 *Metapolygnathus communisti* and *Epigondolella rigoi*. Slope coefficients and R<sup>2</sup> result from the  
694 Reduced Major Axis method. 95% CI values resulting from “sma” function calculation. The p-  
695 value results from the “slope.test” function that compared the coefficients between species and  
696 isometry.

| Regression model         | Species                           | Slope   | Slope CI lower value | Slope CI upper value | R <sup>2</sup> | p-value (h0 = isometric growth) |
|--------------------------|-----------------------------------|---------|----------------------|----------------------|----------------|---------------------------------|
| DNE over platform length | <i>Metapolygnathus communisti</i> | 122.566 | 94.848               | 158.386              | 0.62           | 0                               |
|                          | <i>Epigondolella rigoi</i>        | 163.819 | 120.195              | 223.275              | 0.52           | 0                               |
| DNE over platform area   | <i>Metapolygnathus communisti</i> | 75.411  | 58.210               | 97.696               | 0.61           | 0                               |
|                          | <i>Epigondolella rigoi</i>        | 96.121  | 70.102               | 131.797              | 0.50           | 0                               |

697

698 **Figure captions**

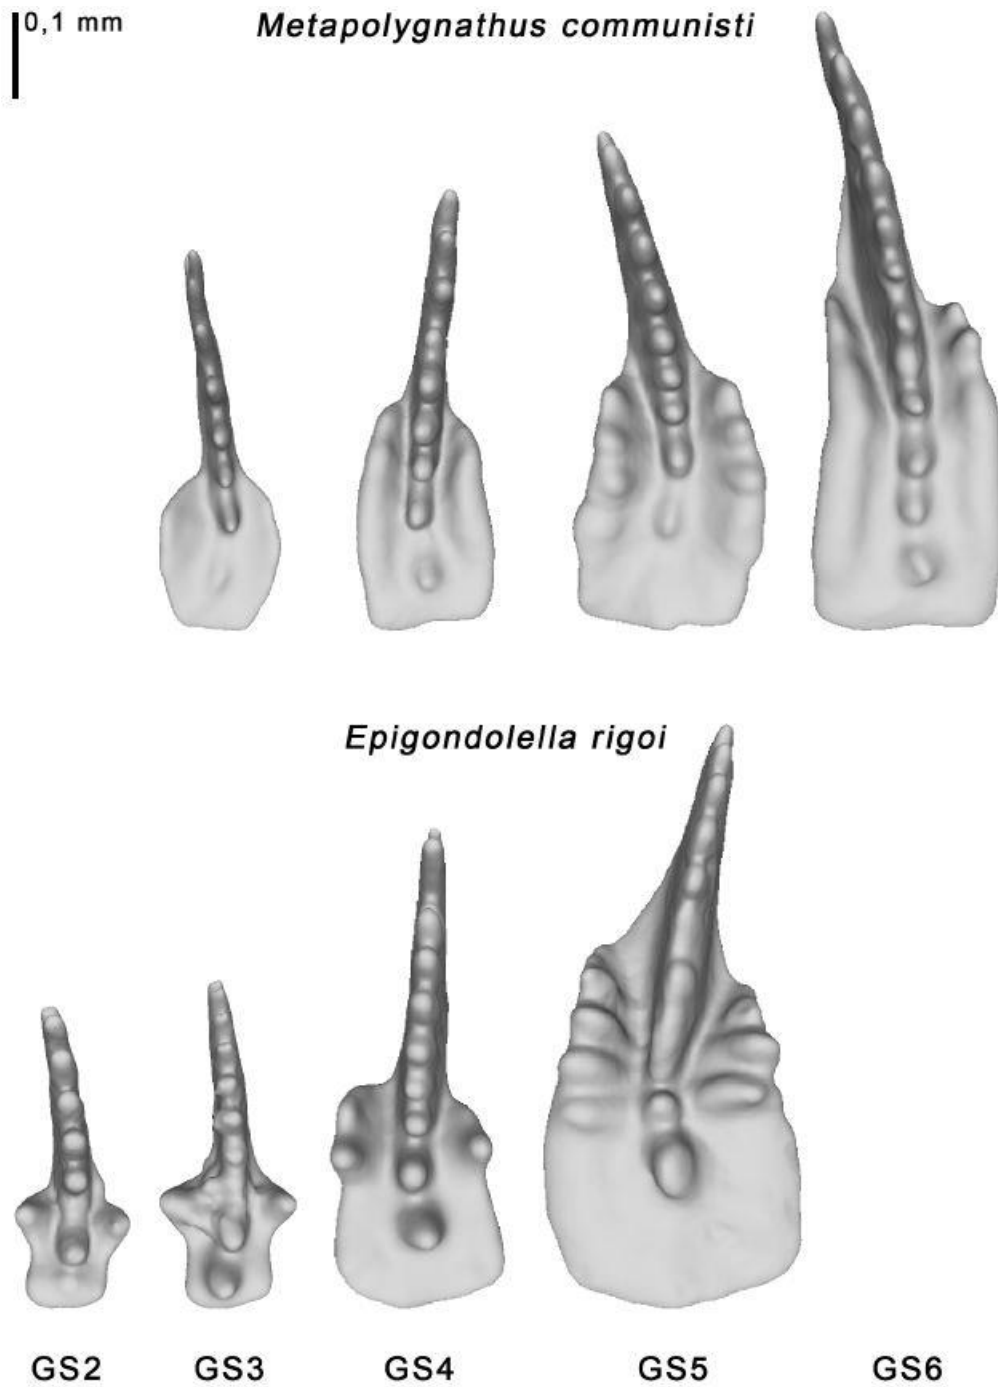

699 **GS2** **GS3** **GS4** **GS5** **GS6**  
700 Figure 1: Growth stages of *Metapolygnathus communisti* and *Epigondolella rigoi*. For  
701 *M. communisti*: **GS3** – specimen NA37\_18; **GS4** – specimen NA37\_12; **GS5** – specimen  
702 NA37\_01; **GS6** – specimen NA37\_24. For *E. rigoi*: **GS2** – specimen NA59\_20; **GS3** – specimen  
703 NA59\_19; **GS4** – specimen NA59\_01; **GS5** – specimen NA59\_05.



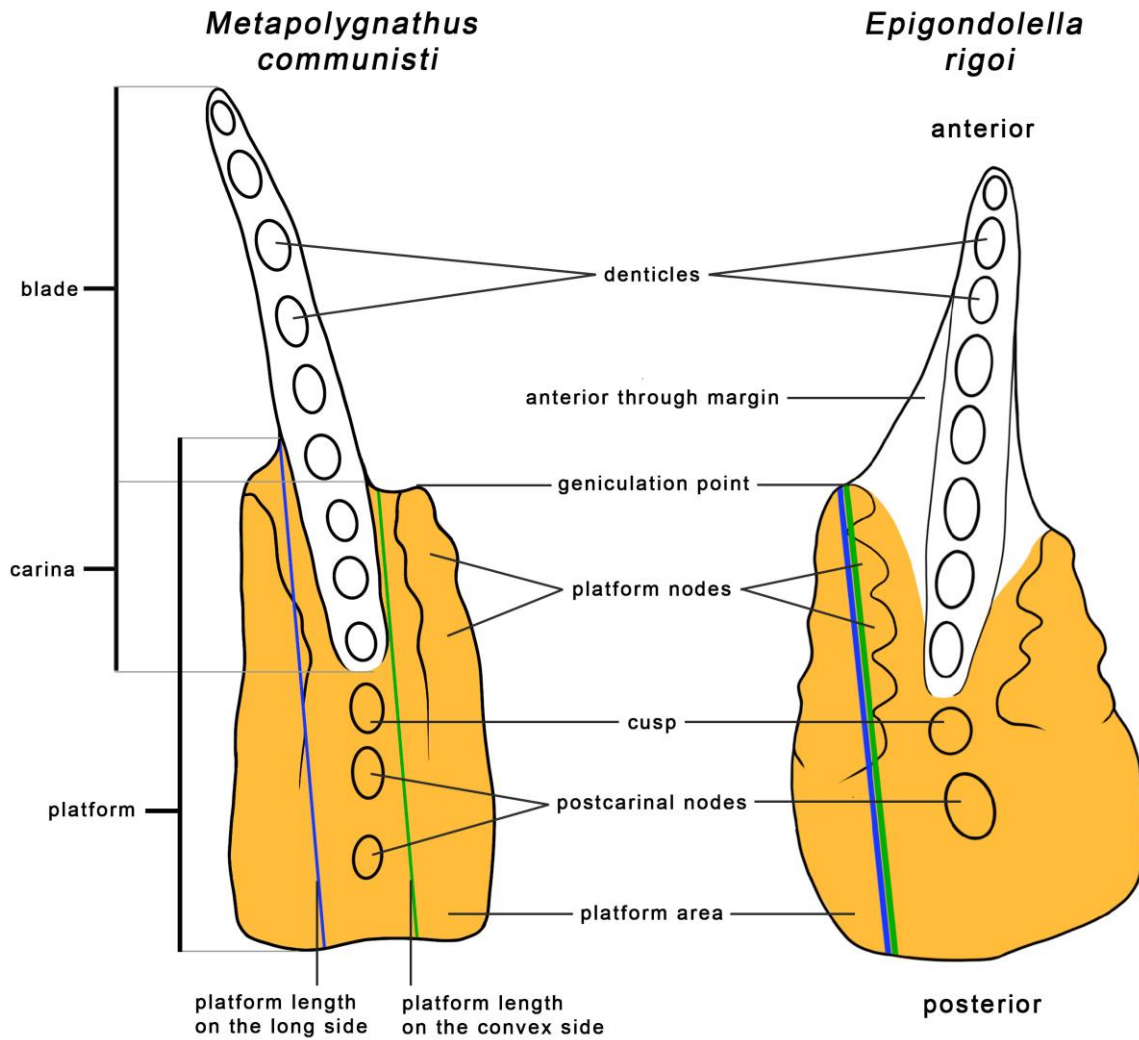

704

705

706

707

708

Figure 2: Measurements and morphological characters of P<sub>1</sub> elements illustrated on *Metapolygnathus communisti* specimen NA37\_24 and *Epigondolella rigoi* specimen NA59\_05. In most cases the convex side is also the long side. Morphological characters follow Mazza et al. (2012a, b).

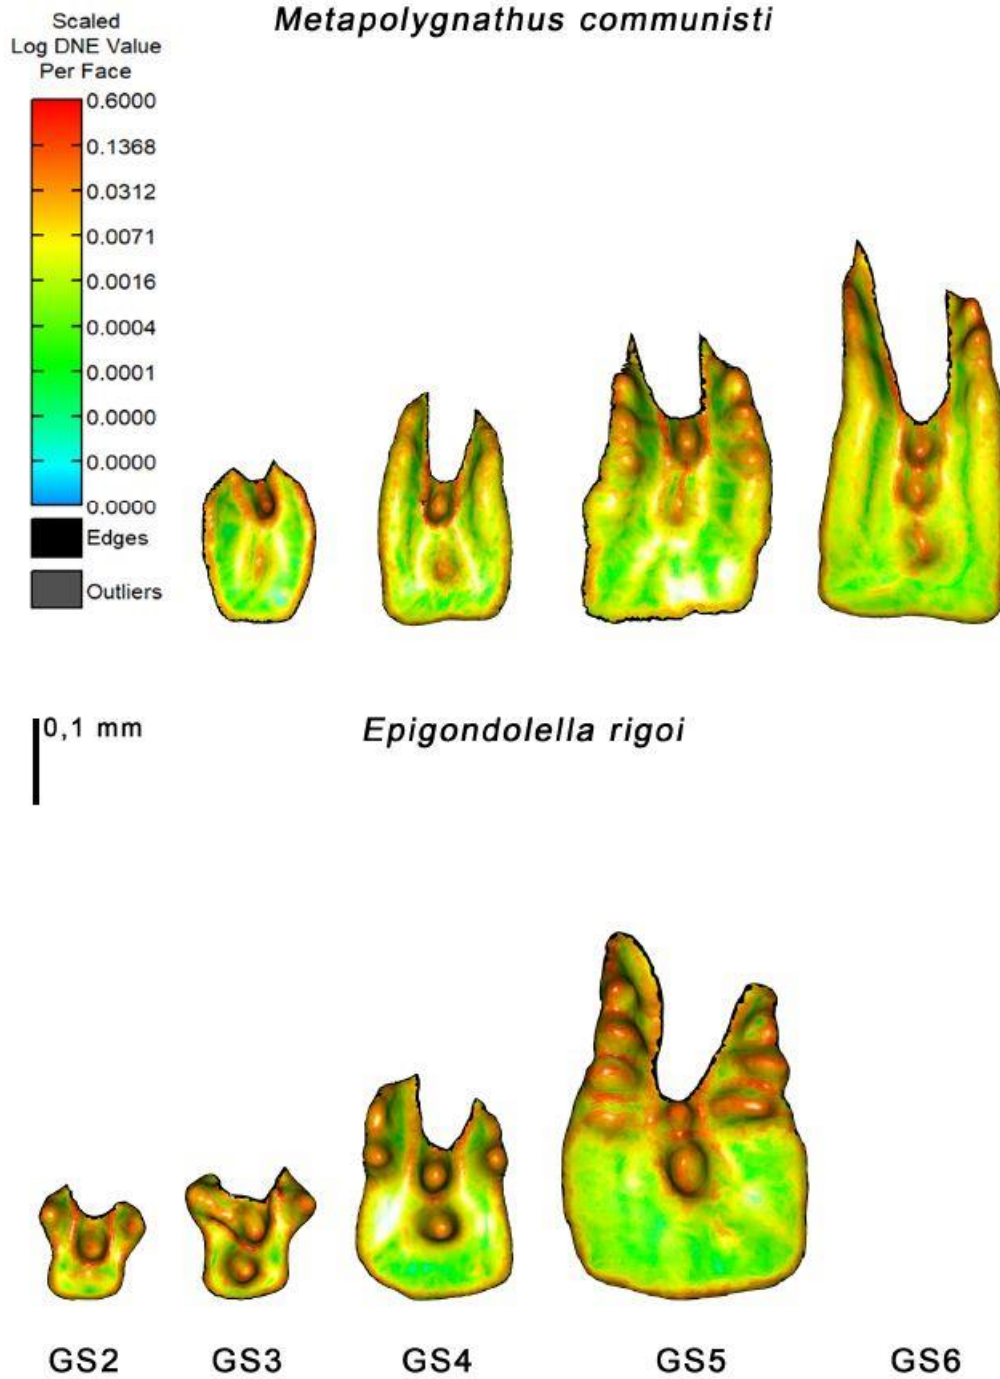

709

710 Figure 3: Log-transformed DNE values across growth stages GS3 to GS6 of *Metapolygnathus*

711 *communisti* and across growth stages GS2 to GS5 of *Epigondolella rigoi*. Names of the

712 specimens are specified in Figure 1.

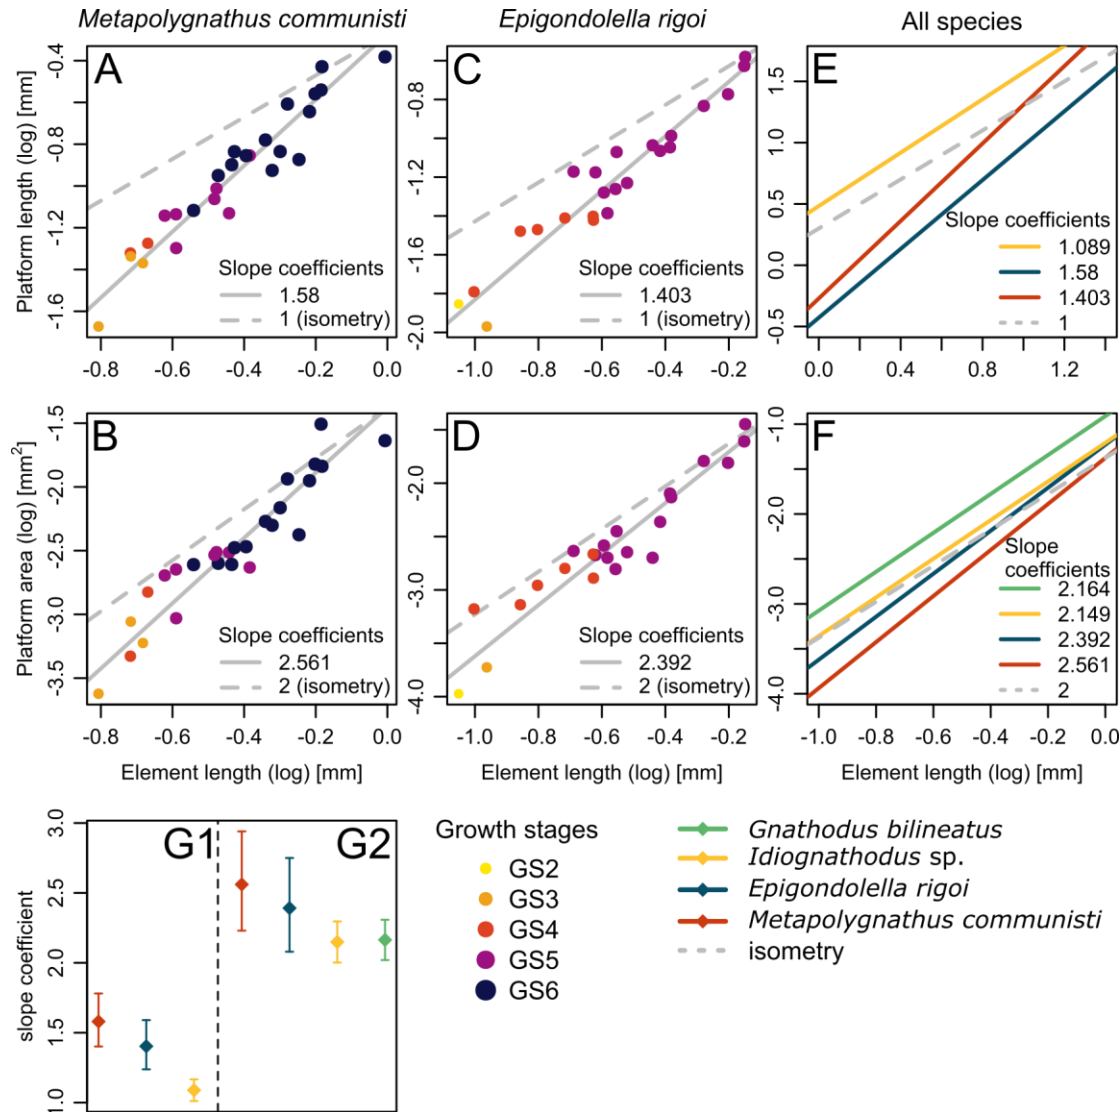

713  
 714 Figure 4: **A-D.** Allometric growth of P<sub>1</sub> platform length and P<sub>1</sub> platform area for  
 715 *Metapolygnathus communisti* (n=27) and *Epigondolella rigoi* (n=23); each dot represents an  
 716 element and the colours are related to the growth stage. **A.** Platform length over element length  
 717 for *M. communisti*; convex platform length only. **B.** Platform area over element length for *M.*  
 718 *communisti*. **C.** Platform length over element length for *E. rigoi*; convex platform length only. **D.**  
 719 Platform area over element length for *E. rigoi*. **E-F.** Comparison of the allometric growth  
 720 between *Gnathodus bilineatus* (Purnell 1994), *Idiognathodus* sp. (Purnell 1993, 1994), *E. rigoi*  
 721 and *M. communisti*. **E.** Platform length over element length. Platform length in *M. communisti*  
 722 and *E. rigoi* was measured on the convex side. No data were available for *G. bilineatus* (Purnell  
 723 1994). **F.** Platform area over element length. **G1-2.** Comparison of slope coefficients between  
 724 species; G1, Platform length over element length; G2, platform area over element length.

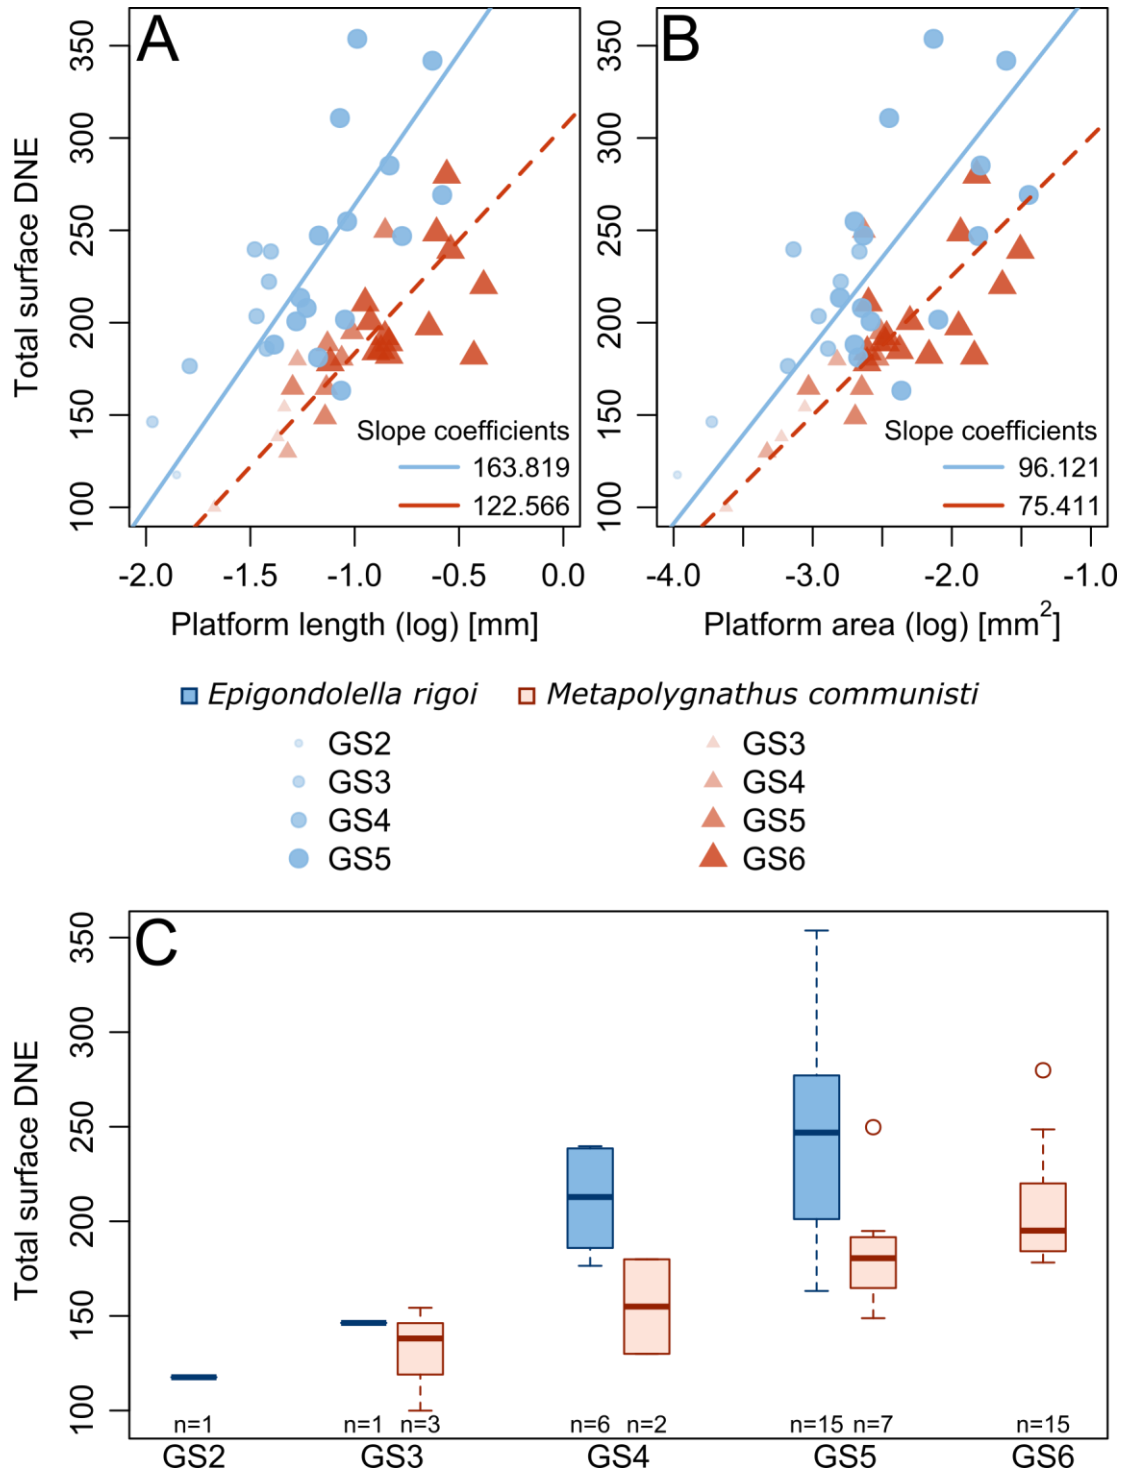

725

726

727

728

729

Figure 5: **A.** Regression of total surface DNE values over platform length in P<sub>1</sub> elements of *Epigondolella rigoi* and *Metapolygnathus communisti*. **B.** Regression of total surface DNE values over platform area in P<sub>1</sub> elements of *E. rigoi* and *M. communisti*. **C.** Distribution of DNE values across growth stages in *E. rigoi* and *M. communisti*.
